# 1 Introduction

2  
3 Surfaces of marine animals were found to be a unique habitat for colonization by  
4 microorganisms, and the microbial communities associated with living surfaces showed a  
5 pronounced variety [1]. Till recently, studies focused on the colonization of benthic organisms  
6 such as sponges [2–6], bryozoans [7], and cnidarians, within which are included mainly corals  
7 [8–13]. Recent studies of bacteria colonizing crustacean surfaces in the marine pelagic  
8 environment, showed considerable dissimilarities with bacterial communities in the  
9 surrounding seawater [14–16]. Recently, associated bacteria were reported for gelatinous  
10 plankton such as appendicularians [17], ctenophores [18–21], and also cnidarian jellyfish  
11 [18,22–28]. Moreover, several studies investigated the role of microbes during jellyfish blooms,  
12 and demonstrated high bacterial growth, changes in bacterial community structure in the  
13 surroundings of live or decaying jellyfish, and subsequently consequences in altering trophic  
14 interactions with higher trophic levels and implications for the carbon, nitrogen, and phosphorus  
15 cycles [29–37].

16  
17 However, very few studies focused on microbial associations with scyphozoan jellyfish during  
18 their life span. Studies show a presence of endobiotic bacteria in jellyfish tentacles [28] and  
19 suggest that jellyfish could be vectors of bacterial pathogens and implicated in infections of  
20 farmed salmon [24,25]. Cleary *et al.* [22] presented data on the bacterial community  
21 composition associated with scyphozoan *Mastigias cf. papua etpisoni* and box jellyfish  
22 *Tripedalia cf. cystophora*, while Weiland-Bräuer *et al.* [27] and Daley *et al.* [18] focused on  
23 *Aurelia aurita* s.l. bacterial associates. These studies showed a diverse and specific associated  
24 bacterial community, which in composition differs among different marine  
25 ecosystems/different jellyfish populations, and has little similarity to the surrounding seawater.

26  
27 Furthermore, Weiland-Bräuer *et al.* [27] showed that *Aurelia aurita* harbours a different  
28 bacterial community on its outer, mucus-covered surface of the exumbrella and gastral cavity,  
29 and that microbial community composition differs at different life stages, especially between  
30 benthic (polyps and strobila) and sequential planktonic life stages (ephyra and juvenile and adult  
31 medusa). In addition, an intracellular *Mycoplasma* strain, a possible endosymbiont, has been  
32 detected. Studying microbiomes in the gastral cavity of *Cotylorhiza tuberculata*, *Mycoplasma*-  
33 like bacteria was one of four bacterial taxa composing a community of reduced diversity [24].  
34 Most of the bacteria were suggested to have an intracellular lifestyle and established a  
35 cooperative relationship with their host. In addition, a new candidate bacterial taxa were  
36 proposed [23,26].

37

38 Bacterial colonization of given surface is determined by the availability of nutrients, host  
39 immune responses, and competition between bacteria from the surrounding environment for  
40 attachment space [38]. The epidermis and gastrodermis of jellyfish, including *A. aurita*, contain  
41 numerous types of unicellular mucus producing gland cells, leading to the formation of thin,  
42 constantly renewing mucus layers over external medusa [39,40]. Under certain conditions like  
43 stress, during reproduction and digestion, and also when dying, the amount of released mucus  
44 is even more pronounced ([40] and the references within). Mucus on jellyfish surfaces was also  
45 found to have a role in surface cleaning and defense against predators. Shanks and Graham [41]  
46 characterized mucus secretion as an important chemical defense mechanism, since it contained  
47 toxins and discharged and undischarged nematocysts. The contribution to jellyfish chemical  
48 defense is, besides mucus, the production of toxins or antimicrobial compounds, such as  
49 isolated antibacterial peptide aurelin from mesoglea of *Aurelia aurita* [42].

50  
51 Further, secreted mucus, whether still covering the surface of jellyfish or already dissociated in  
52 forms of blobs, is an attractive niche for bacteria. Since jellyfish mucus is composed mainly of  
53 proteins, lipids, and lower percentage of carbohydrates [43], it is a high quality energy source  
54 which is readily utilized by bacteria, especially those with a competitive advantage and  
55 specialized for settling from surrounding seawater. This indicates that jellyfish as a host can  
56 actively or passively affect/select bacterial associates. In addition, bacterial community  
57 structure can be also influenced by bacterium-bacterium antagonism, as seen on particles [44],  
58 and by environmental conditions determining the presence of metabolically active bacteria and  
59 physiological responses of the host [45]. Whether bacteria directly adhere to external cell layers  
60 of jellyfish, or are only associated in the thin mucus layer is not clear, however all of the above  
61 indicates that the association of bacteria with jellyfish is highly dynamic and complex.

62  
63 *Aurelia* are among the most widespread scyphozoan medusae that form large aggregations in  
64 coastal areas, fjords, and estuaries, and other semi-enclosed or enclosed systems. Moon jelly,  
65 *Aurelia* sp. 8 [46] recently designated as *A. solida* [47], is also a very common jellyfish in the  
66 northern Adriatic Sea, where 200 years of data show the stabilization of its massive  
67 reoccurrence after 2002 [48]. Medusae are generally present from February until late June [49],  
68 with peak abundance in the spring [48,50]. The jellyfish outbreaks worldwide seem to become  
69 more frequent and last longer in recent years [51]. Whether this is just a rising phase of a natural  
70 pattern of decadal oscillations or a true increase of gelatinous zooplankton blooms is still  
71 unclear [52]. Still, some data show more frequent and abundant jellyfish aggregations in some  
72 coastal areas around the world [48,53], causing numerous socio-economic and ecological  
73 problems [54,55]. It has been hypothesized that jellyfish benefit from human-caused changes  
74 in environment such as climate change, overfishing, eutrophication, habitat modification, and  
75 species introductions [56–59].

76

77 This study is the first to investigate the associations of bacteria with live moon jellyfish in the  
78 Gulf of Trieste (northern Adriatic Sea) using both culture-independent and culture-based  
79 methods. Our hypotheses were the following: (i) the bacterial community associated with  
80 medusa is specific and significantly different from the ambient bacterial population in the  
81 environment; (ii) the bacterial community composition of different body parts of medusa, i.e.  
82 exumbrella surface, oral arms, and of gastral cavity vary; and (iii) medusa-associated bacterial  
83 community structure at the time of jellyfish population peak and during senescent phase at the  
84 end of bloom, when jellyfish start to decay, differ.

85

86

## 87 **Materials and Methods**

88

### 89 **Sampling site and sampling**

90

91 The Gulf of Trieste is the northernmost part of the Adriatic Sea. It is characterized by a shallow  
92 water column, with salinity and temperature variations, and strong seasonal stratification in late  
93 summer [60]. In such an environment, *Aurelia* populations show clear seasonality with late-  
94 autumn-early winter recruitment of ephyrae from attached polyps, spring medusa growth, and  
95 their decay at high early summer temperatures [59].

96

97 Sampling of *Aurelia* medusae was performed during the warmer part of the year in the  
98 beginning of May and late June 2011, at the time of adult medusa biomass accumulation. While  
99 in May, at the time of population peak, jellyfish were viable and swimming actively, in June,  
100 at the end of blooming period, sampled jellyfish were already in the senescent phase and started  
101 to decay. Jellyfish were sampled individually by divers or from a boat with a sample bucket.  
102 Each individual was placed in plastic bag with some seawater and was transported to the  
103 laboratory. Before further analysis, each jellyfish was measured and rinsed twice with sterile  
104 seawater (0.2  $\mu\text{m}$  pre-filtered and autoclaved). For determination of the total bacterial  
105 community associated with *Aurelia*, samples of exumbrella and oral arms of about 8  $\text{cm}^2$  in  
106 size, were cut out with a sterile razor blade and stored at  $-80\text{ }^\circ\text{C}$ . At the same time, mucus from  
107 gastral cavity was sampled with a sterile syringe and stored under the same conditions.

108 At the same time of medusa sampling, ambient seawater samples were collected with a Niskin  
109 sampler ( $V=5\text{L}$ ) at 5 m depth at the oceanographic buoy Vida ( $45^\circ 32' 55.68''\text{N}$ ,  $13^\circ 33' 1.89''$   
110 E), where most of jellyfish were restrained at the time of sampling. Each time before sampling  
111 standard physical properties, including seawater temperature, salinity and oxygen concentration  
112 were measured with a CTD fine-scale probe (Microstructure Profiler MSS90, Sea & Sun  
113 Technology GmbH).

114

## 115 **Bacterial isolates from jellyfish and seawater samples**

116

117 Viable bacterial cells from the surfaces of jellyfish and seawater samples were determined with  
118 the spread plate method on modified ZoBell marine agar media [61]. For jellyfish exumbrella,  
119 the whole exumbrella surface was inoculated on the plate to create jellyfish imprints of  
120 exumbrella-associated bacteria, while the gastro vascular cavity was scraped with a sterile  
121 cotton swab and spread evenly over the surface of agar plates. For seawater samples, 100  $\mu$ L  
122 was evenly spread on an agar plate. Inoculated plates were incubated in the dark at an *in situ*  
123 temperature for 21 days. For each plate, the number of colony forming units (CFU) was  
124 determined and distinctive morphological types of colonies were described. Since direct prints  
125 of jellyfish exumbrella were created on agar plates, we estimated the abundance of bacteria as  
126 CFU/cm<sup>2</sup>. For DNA extraction, individual colonies were aseptically picked and streaked onto  
127 fresh agar plate until single colonies were obtained. A single colony of each bacterial isolate  
128 was inoculated in modified liquid ZoBell media and incubated in the dark at the *in situ*  
129 temperature until growth was observed (increased turbidity). Part of the liquid cultures was  
130 stored in 30% glycerol (final concentration) at – 80 °C for bacterial culture collection. Data on  
131 the seawater cultivable bacterial community from the Gulf of Trieste were taken from the  
132 dataset gathered during two-year sampling campaign of cultivable bacterial community, of  
133 which the sampling time and location coincided with the sampling time of jellyfish (May and  
134 June 2011) (Acc. No. KC307273- KC307520). Also, for this dataset sampling was performed  
135 at 5 m depth and the bacterial culture collection was obtained as described above.

136

### 137 *DNA extraction and PCR*

138 Bacterial DNA was extracted from a liquid culture with a modified Chelex-based procedure  
139 [62], or with a commercial kit (NucleoSpin Tissue, Macherey - Nagel) according to  
140 manufacturer's protocol. Bacterial cells were harvested by centrifugation and washed twice  
141 with 1x PBS buffer (stock 10x; 1.4 M NaCl, 27 mM KCl, 101 mM Na<sub>2</sub>HPO<sub>4</sub>, 18 mM KH<sub>2</sub>PO<sub>4</sub>).  
142 When using Chelex (BioRad), the washed cells were re-suspended in 200  $\mu$ l of 5% Chelex  
143 solution. The suspension was incubated for 15 min at 99 °C and transferred at 4 °C for 10 min.,  
144 and was centrifuged at 4000 rpm for 10 min. The water phase with dissolved DNA was  
145 transferred to a new tube and stored at -20 °C until further downstream applications. Bacterial  
146 16S rRNA genes were amplified using universal bacterial primers 27F and 1492R. The PCR  
147 reaction mix (50  $\mu$ l) contained 2  $\mu$ l (50-100 ng) of extracted genomic DNA, 1x reaction buffer  
148 (TrisKCl-MgCl<sub>2</sub>), 2 mM MgCl<sub>2</sub>, 0.2 mM dNTP, 1  $\mu$ M of each primer, and Taq polymerase  
149 (5U/ $\mu$ l, Fermentas). The PCR temperature cycling conditions were as follows: initial  
150 denaturation at 94°C for 2 min.; 30 cycles of denaturation at 94°C for 1 min., annealing at 55°C  
151 for 2 min., and elongation at 72°C for 2 min. The final cycle was followed by extension at 72°C

152 for 5 min. The quality and size of PCR products was confirmed by agarose gel electrophoresis  
153 (1% agarose (Sigma) in 1x TAE buffer) with etidium bromide (10 mg/ml) and visualized using  
154 an UV transilluminator (BioDocAnalyze Gel documentation system, Biometra). The bacterial  
155 16S rRNA genes were partially sequenced with 27F primer at Macrogen Inc.

156

## 157 **Total bacterial community composition**

158

### 159 *Jellyfish-associated bacterial community DNA extraction*

160 Exumbrella and oral arms samples were thawed down. Bacterial DNA was extracted with  
161 CTAB (cetyl- trimethyl-ammonium bromide) as described before [21] with slight modification.  
162 Samples were placed into a tube containing 2% CTAB solution (1.4 M NaCl, 100 mM Tris\_Cl  
163 pH= 8, 2% CTAB, 20 mM EDTA pH=8, 0.2% β- mercaptoethanol), and were incubated at  
164 65°C for 1 h. Afterwards, a STE buffer (6.7% sucrose, 50 mM Tris-Cl pH= 8, 1 mM EDTA  
165 pH= 8) and proteinase K (100 µg/ml final concentration, Sigma) were added and the mixture  
166 was incubated at 55°C overnight. Following chloroform-isoamylalcohol (24:1, v/v, Sigma) and  
167 phenol- chloroform- isoamylalcohol (25:24:1, v/v, Sigma) purification steps, DNA was  
168 precipitated at - 20°C overnight with isopropanol. The pellet was washed with 70% ice-cold  
169 ethanol and dried in a speed vac. The precipitated DNA was re-suspended in 0.22 µm pre-  
170 filtered, autoclaved 1X TE buffer, and kept at - 20°C.

171

### 172 *Seawater's total bacterial community DNA extraction*

173 Seawater samples were filtered onto 0.2 µm polyethersulfone membrane filters (47 mm  
174 diameter, PALL Inc.), which were stored at - 80°C. DNA was extracted from the filters (one  
175 quarter per sample) as described in Böstrom *et al.* [63], with slight modifications. DNA was  
176 precipitated at - 20°C for 1 h, with 0.1 volume of sodium acetate (3 M NaAc, pH= 5.2) and 0.6  
177 volume of isopropanol. The pellet was washed with 70% ice-cold ethanol and dried in a speed  
178 vac. Precipitated DNA was re-suspended in 0.22 µm, pre-filtered, autoclaved TE buffer, and  
179 kept at - 20°C.

180

### 181 *Denaturing Gradient Gel Electrophoresis*

182 For DGGE analysis of jellyfish-associated and seawater's total bacterial community, the  
183 bacterial 16S rRNA genes were amplified using a universal primer set, 341F with a 40 bp GC-  
184 clamp and 907R as described before [64,65]. The PCR reaction mix with a final volume 50 µl  
185 contained 2 µl of extracted DNA (50–100 ng), 1x reaction buffer (Tris KCl-MgCl<sub>2</sub>, Fermentas),  
186 1.5 mM MgCl<sub>2</sub> (Fermentas), 0.2 mM dNTP (Fermentas), 0.5 µM of each primer (Sigma), 0.38  
187 µg/ml BSA (Fermentas), and Taq polymerase (5 U/µl, Fermentas). The PCR touchdown  
188 protocol according to Don *et al.* [66] was used: with initial denaturation at 94°C for 5 min.,  
189 followed by 10 touchdown cycles and 20 standard cycles: denaturation for 1 min. at 94°C,



190 primer annealing for 1 min. at 55°C, and primer extension for 3 min. at 72°C. The last cycle  
191 was followed by 2 min. incubation at primer extension temperature of 72°C.

192

193 When we were unable to obtain a sufficient quantity of PCR products from jellyfish samples,  
194 we used a two-step nested PCR- DGGE strategy [67], modified to analyze the marine bacterial  
195 community. Bacterial 16S rRNA genes were first amplified with universal primer set, 27F and  
196 1492R. The PCR reaction mix, with a final volume 50 µl, contained 2 µl of extracted DNA (50-  
197 100 ng), and was prepared the same as described above in this section. The PCR temperature  
198 cycling conditions were as follows: initial denaturation for 2 min. at 94°C, followed by 25  
199 standard cycles: denaturation at 94°C for 1 min., primer annealing for 1 min. at 50°C, and  
200 primer extension at 72°C for 1 min. The last cycle was followed by 5 min. incubation at the  
201 primer extension temperature of 72°C. Second, nested amplification was performed using a  
202 DGGE primer set, PCR mixture, and a touchdown annealing protocol, as described above in  
203 this section. The quality and size of PCR products were tested by agarose gel electrophoresis.  
204 PCR products were analyzed by DGGE electrophoresis, as previously described in [33].

205 Distinct bands were excised from the gel and placed in 100 µl of sterile Sigma water overnight  
206 to elute DNA. The eluted DNA was re-amplified using primer set 341F and 907R and the same  
207 reaction mix (a final volume 50 µl) with 2 µl of eluted DNA, as described above in the first  
208 paragraph in this section. The cycling protocol used was the same as to amplify the DNA of  
209 bacterial isolates (see section on Bacterial isolates DNA extraction and PCR). The bacterial 16S  
210 rRNA genes were partially sequenced with 341F primer at Macrogen Inc.

211

#### 212 *Bacterial 16S rRNA gene clone libraries*

213 For jellyfish and seawater samples clone libraries construction, bacterial 16S rRNA gens were  
214 amplified using the same DNA as for DGGE and universal primer set, 27F and 1492R, as  
215 described before [33]. The PCR reaction mix with a final volume 50 µl contained 2 µl of  
216 extracted DNA (50-100 ng), and was prepared as described above (see section on DGGE, first  
217 paragraph). For samples with low DNA concentration (extracted from jellyfish samples), a  
218 nested PCR-libraries approach was used [68], and modified to analyze marine bacterial  
219 community. Again, bacterial 16S rRNA gene was first amplified with a universal primer set,  
220 27F and 1492R using same protocol and reaction mix as in the first amplification step of the  
221 nested PCR-DGGE strategy (see the section on DGGE, second paragraph). Second, nested  
222 amplification was performed using primers 341F and 907R. The PCR reaction mixture and  
223 cycling protocol were the same as used for clone library construction (described above in this  
224 section [33]). The PCR products were immediately ligated into a commercially available pCR  
225 2.1 vector and transformed into competent *E. coli* TOP 10 cells using a commercially available  
226 TA Cloning Kit (Invitrogen), and according to the manufacturer's protocol. The plasmid inserts

227 from of each clone library were partially sequenced using M13F primer or 27F primer at  
228 Macrogen Inc.

229

### 230 **Sequence analyses**

231

232 Raw sequence data recovered from bacterial isolates and clone libraries were passed through  
233 the DNA Baser program ([www.DNAbaser.com](http://www.DNAbaser.com)) to remove traces of sequencing primer, and to  
234 trim away ambiguous bases at the end of a sequence. The clone libraries sequences were also  
235 checked for vector contamination and were analyzed with the program Bellerophon  
236 (<https://greengenes.lbl.gov/>) to detect chimeric sequences, which were removed. Additionally,  
237 Mothur software [69] was used to further reduce poor quality sequence data. Sequence  
238 taxonomic identities (with  $\geq 97\%$ ) of bacterial isolates and sequences recovered from clone  
239 libraries and DGGE bands were assigned using the BLAST (Basic Local Alignment Tool)  
240 algorithm available at NCBI (National Centre for Biotechnology Information). Around 50% of  
241 the sequences recovered from clone libraries and DGGE bands exhibited  $<97\%$  similarity to  
242 previously published GenBank entries (omitted from further analysis). Classification of  
243 bacterial isolates was done down to the genus level, and of clones and DGGE bands down to  
244 the family level. The number (N) of high quality sequences, with  $\geq 97\%$  similarity to the nearest  
245 GenBank entry, and the number of distinct bacterial genus and families ( $S_{obs}$ ) is presented in  
246 Supporting Information (S1 Table, S2 Table). The contribution of distinct bacterial genus or  
247 families was expressed as a percentage of the total number of sequences in each sample or  
248 library (relative abundance) (S1 Table, S2 Table). Chloroplast sequences were omitted from  
249 further analysis.

250

#### 251 *Nucleotide sequence accession numbers*

252 The 16S rRNA gene sequences, for all bacterial isolates, clone libraries, and DGGE bands,  
253 obtained in this study have been deposited in the GenBank (NCBI) under following accession  
254 numbers: from KF816449 to KF816471, and KF816480 to KF816592 for bacterial isolates  
255 (Supporting information, Table S5), from KF816761 to KF816832, from KF817469 to  
256 KF817519, from MF952738 to MF952748, and from MF952764 to MF952865 for sequences  
257 obtained from clone libraries, and from MF952749 to MF952763 for sequences obtained from  
258 DGGE bands.

259

### 260 **Diversity indices and statistical analyses**

261

262 To compare the diversity of viable bacterial isolates from jellyfish and surrounding seawater,  
263 ecological diversity indices were calculated for each sample: the number of different bacterial  
264 genus (species richness ( $S_{obs}$ )), Shannon diversity index ( $H'$ ), Margalef's index ( $d$ ), Pielou's

265 evenness index ( $J'$ ) and Chao-1 index. The same parameters were calculated for 16S rRNA  
266 bacterial clone libraries at the family level. Additionally, in order to estimate how well the  
267 actual species composition was captured, for each clone library a coverage value was calculated  
268 as  $C = 1 - n_1/N$ , where  $n_1$  is the number of phylotypes appearing only once in the library, and  $N$   
269 is the library size [70].

270  
271 Non-metric multi-dimensional scaling (nMDS) plots were used to determine the similarities  
272 between DGGE banding patterns. For this purpose, a similarity matrix was calculated (using  
273 Jaccard resemblance measure) based on the presence/absence matrix of align bands. Analysis  
274 of similarity (ANOSIM) was used to verify the significance of similarity among bacterial  
275 communities, as indicated by nMDS, by testing the hypothesis that bacterial communities from  
276 the same cluster are more similar to each other than to communities in different clusters.

277 Cluster analysis was used to determine scaled similarities between 16S rRNA gene clone  
278 libraries (total bacterial communities) and between bacterial isolates (culturable bacterial  
279 communities). For cluster analysis of 16S rRNA gene clone libraries, a Bray-Curtis similarity  
280 matrix was constructed from arcsine-transformed relative abundances of distinct bacterial  
281 families in each clone library. For bacterial isolates, a Bray-Curtis similarity matrix was  
282 constructed from untransformed relative abundances of distinct bacterial genus in each  
283 culturable bacterial community. Based on the similarity matrix, dendrogram was produced with  
284 group-average linkage algorithm. The similarity profile test (SIMPROF) was used to define  
285 statistically significant clusters in samples.

286  
287 To examine the difference between communities associated to different jellyfish body parts and  
288 seawater, one-way ANOSIM statistic with 999 permutations, based on Bray-Curtis similarity  
289 matrix, was made. Samples were grouped according to isolation source (communities of  
290 jellyfish exumbrella (AK), jellyfish oral arms (AR) and jellyfish gastral cavity (AG) and  
291 communities of seawater (W)). Similarly, one-way ANOSIM statistic with 999 permutations  
292 was made to examine the difference between communities associated with jellyfish at the time  
293 of population peak and at the end of blooming period. Samples were grouped according to time  
294 (communities associated to jellyfish sampled at time of population peak (May) and those  
295 sampled at the end of the bloom, when jellyfish were in senescent phase (June)). Additionally,  
296 similarities percentage (SIMPER) analysis was used to determine which bacterial group  
297 contribute the most to the differences between communities of different body parts of jellyfish  
298 and water communities (for culturable and total bacterial community). Diversity indices and  
299 statistical analysis were performed using Primer v6 [71] and PAST, version 3.9 [72].

300

301

302 **Results**



303

304 The composition of the bacterial community associated with scyphomedusae *Aurelia*, which  
305 frequently blooms in the Northern Adriatic, was studied and compared with the community  
306 composition from the surrounding seawater, in order to understand if the jellyfish-associated  
307 community is specific and significantly distinct from the ambient seawater bacterial  
308 assemblage. The composition of bacterial community associated with different jellyfish  
309 compartments (exumbrella surface, oral arms, and in the gastral cavity) was analysed to  
310 examine the compartment-specificity of associated bacterial consortia. In addition, we  
311 compared the composition of the bacterial community associated with jellyfish collected during  
312 two different time points of bloom development/progression: (i) at the peak of population, and  
313 (ii) at the end of the blooming period/at the decay of the bloom. The bacterial community  
314 composition/structure was determined using both culture-independent and culture-dependent  
315 techniques.

316

### 317 **Comparison of jellyfish-associated and ambient seawater bacterial community** 318 **composition**

319

320 The phylogenetic analyses of the bacterial 16S rRNA gene clone libraries revealed significant  
321 difference between jellyfish-associated and ambient seawater bacterial communities  
322 (ANOSIM, global R= 0.777,  $p < 0.01$ ) (Fig 1A). The bacterial communities associated with  
323 *Aurelia* showed the dominance of bacterial phyla *Proteobacteria*, which consisted of  
324 *Alphaproteobacteria* (up to 75%), *Gammaproteobacteria* (up to 45.5%), and  
325 *Betaproteobacteria* (up to 53.5%), with different relative contributions in the individual  
326 jellyfish sample (Fig 1B). At the family level, *Alphaproteobacteria* were dominated by  
327 *Rhodobacteraceae* (mostly *Phaeobacter*, *Ruegeria*) and *Betaproteobacteria* by  
328 *Burkholderiaceae* (*Burkholderia*) (Fig 1B, S1 Table). Within *Gammaproteobacteria*, mostly  
329 *Vibrionaceae* (*Vibrio*), *Pseudoalteromonadaceae* (*Pseudoalteromonas*), *Xanthomonadaceae*  
330 (*Stenotrophomonas*), and *Pseudomonadaceae* (*Pseudomonas*) (Fig 1B, S1 Table) were  
331 detected.

### 332 **Fig 1. Bacterial 16S rRNA gene clone libraries constructed from samples of *Aurelia*** 333 **jellyfish and ambient seawater.**

334 (A) Cluster analysis based on bacterial 16S rRNA gene clone libraries. AK-jellyfish exumbrella  
335 surface, AR-jellyfish oral arms, AG-mucus from gastral cavity and W-ambient seawater.  
336 Samples were collected in May (grey squares) and June (inverted black triangles). The  
337 dendrogram was inferred with the group average algorithm, based on the Bray–Curtis similarity  
338 matrix of arcsine transformed averaged abundances. Grey branches do not differ significantly  
339 (SIMPROF test,  $p > 0.05$ ). (B) Composition of bacterial 16S rRNA gene clone libraries  
340 (expressed as percentage of clones) constructed from samples of jellyfish exumbrella surface  
341 (AK1, AK2), oral arms (AR1), mucus from gastral cavity (AG1) and the ambient seawater  
342 (W\_May) sampled in May and jellyfish exumbrella surface (AK6, AK7), oral arms (AR6) and

343 the ambient seawater (W\_Jun) sampled in June. Cumulative column charts represent relative  
344 abundances of bacterial family and area chart in the background represent relative abundances  
345 of major bacterial groups and *Proteobacteria* class. Taxa with relative abundance of < 3% across  
346 all samples are subsumed under Other Bacteria.

347

348 In comparison to the jellyfish-associated bacterial community, the ambient seawater bacterial  
349 community was more diverse and dominated by three bacterial phyla: *Proteobacteria*,  
350 *Flavobacteria*, and Cyanobacteria (Fig 1B, S5 Table). *Alphaproteobacteria* (up to 38.6%) were  
351 dominated by *Rhodobacteraceae* and SAR11, *Gammaproteobacteria* (up to 21.4%) by  
352 *Litoricolaceae* and SAR86; *Flavobacteria* (up to 17.4%) by *Flavobacteriaceae* and  
353 *Cryomorphaceae*, and *Cyanobacteria* (up to 15.4%) by *Synechococcus*. We also detected  
354 *Actinobacteria* (10.3% in May) with the representative from the *Microbacteriaceae* family. (Fig  
355 1B, S1 Table). According to SIMPER analysis *Synechococcus*, SAR11 and *Flavobacteriaceae*  
356 contributed the most to difference between jellyfish-associated and water column bacterial  
357 community (S3 Table).

358

### 359 **The bacterial community composition associated with different body parts of jellyfish**

360

361 The results of 16S rRNA gene clone libraries analysis pointed on the statistically significant  
362 differences between bacterial communities associated with different body parts of jellyfish  
363 (exumbrella surface, oral arms, and gastral cavity) (ANOSIM, global R= 0.571, p< 0.05)(Fig  
364 1A). The bacterial communities' composition associated with different body parts of jellyfish  
365 sampled at the peak of population, were as follows. The bacterial communities associated with  
366 jellyfish exumbrella were dominated by *Alphaproteobacteria* (up to 75%), followed by  
367 *Gammaproteobacteria* (up to 22.2%) and *Betaproteobacteria* (up to 12.5%) (Fig 1B). The  
368 population of *Alphaproteobacteria* was dominated by *Rhodobacteraceae*, mostly *Phaeobacter*,  
369 *Ruegeria*, but also *Rhizobiaceae*, *Hyphomicrobiaceae*, and *Sphingomonadaceae* were detected.  
370 Within *Gammaproteobacteria*, mostly *Xanthomonadaceae* (*Stenotrophomonas*), but also  
371 *Alteromonadaceae* (*Alteromonas*), and within *Betaproteobacteria* exclusively  
372 *Comamonadaceae* were detected. (Fig 1B, S1 Table). The bacterial community of jellyfish oral  
373 arms was more diverse than the bacterial community associated with exumbrella and gastral  
374 cavity (S5 Table). The bacterial community associated with oral arms consisted of  
375 *Alphaproteobacteria* (50%, exclusively *Rhodobacteriaceae*) and a higher percentage of  
376 *Gammaproteobacteria* (31.3%) composed mainly of *Vibrionaceae* (*Vibrio*), but also  
377 *Pseudoalteromonadaceae*, *Moraxellaceae*, and *Pseudomonadaceae*. *Betaproteobacteria* were  
378 detected (12.5%, only *Burkholderiaceae*), and also a small percentage of *Actinobacteria* (6.3%)  
379 (Fig 1B, S1 Table). In contrast, the bacterial community in the gastral cavity, was dominated  
380 by *Betaproteobacteria* (53.5%), followed by *Gammaproteobacteria* (27.9%) and  
381 *Actinobacteria* (11.6%, dominated by *Micrococcaceae*). At the family level, *Burkholderiaceae*  
382 (*Burkholderia*) and *Alcaligenaceae* dominated the *Betaproteobacteria* class. The

383 gammaproteobacterial population was almost exclusively *Pseudomonadaceae* (*Pseudomonas*)  
384 (Fig 1B, S1 Table).

385 The bacterial community structure of different jellyfish body parts was also studied using  
386 denaturing gradient gel electrophoresis (DGGE). Bacterial community fingerprints varied, both  
387 within and between sample types (exumbrella, oral arms, and gastral cavity). Despite the  
388 observed heterogeneity (S1 Fig), the DGGE-based non-metric multidimensional scaling  
389 (nMDS) analysis showed that bacterial communities clustered according to jellyfish body part  
390 (S1 Fig) (ANOSIM, global R= 0.633, p< 0.05). Jellyfish-associated bacterial community  
391 composition was more similar between replicates of the samples collected from the same body  
392 parts (40%) than different jellyfish body parts ( Fig 2). Phylogenetic information obtained from  
393 excised DGGE bands showed that bacterial taxa across all samples mostly belonged to  
394 *Alphaproteobacteria* (*Roseobacter*, *Phaeobacter*, *Ruegeria* all *Rhodobacteraceae*), but also  
395 *Gammaproteobacteria* (*Vibrio*, *Pseudoalteromonas*, *Stenotrophomonas*) and  
396 *Betaproteobacteria* (*Burkholderia*) (S1 Fig, S7 Table).

397 **Fig 2. Non-metric multidimensional (nMDS) analysis based on bacterial community**  
398 **DGGE banding patterns of *Aurelia* jellyfish samples.**

399 AK- jellyfish exumbrella surface, AR-jellyfish oral arms, AG- mucus from gastral cavity and  
400 W- ambient seawater. Samples were collected in May (grey squares) and June (inverted black  
401 triangles). Resemblance circles: grey line - 40% similarity; black line - 50% similarity.

402

### 403 **Bacterial community structure shifts due to jellyfish population senescence**

404

405 Our results show the difference between the bacterial communities associated with jellyfish  
406 collected during the peak of the jellyfish bloom and one month later, at the jellyfish population  
407 senescence (Fig 1). Changes in bacterial communities, due to jellyfish population senescence  
408 were evident as the shift towards *Gammaproteobacteria*, mostly at the expense of  
409 *Betaproteobacteria*, and to a lesser extent at the expense of *Alphaproteobacteria*, whose  
410 dominance became less pronounced. In addition, diversity was lower in the bacterial  
411 community associated with senescent jellyfish (S5 Table). Bacterial communities associated  
412 with exumbrella surface were composed of *Gammaproteobacteria* (up to 42.9%) and  
413 *Alphaproteobacteria* (up to 66.7%; almost exclusively *Rhodobacteriaceae* of which mostly  
414 *Roseovarius*, *Ruegeria*). Within *Gammaproteobacteria*, previously dominant  
415 *Xanthomonadaceae* were replaced with *Alteromonadaceae* (*Marinobacter*) and *Vibrionaceae*  
416 (*Vibrio*). In addition, *Pseudoalteromonadaceae* (*Pseudoalteromonas*) and *Moraxellaceae* were  
417 detected (Fig 1B, S1 Table). A similar change/shift was evident in the bacterial community  
418 structure determined in the sample of oral arms. *Gammaproteobacteria* were dominant (45.5%;  
419 taxa composition similar to that associated with exumbrella surface, with even more  
420 pronounced *Vibrio* dominance), followed by *Alphaproteobacteria* (36.4%, exclusively  
421 *Rhodobacteraceae*) and *Betaproteobacteria* (18.2%, exclusively *Burkholderiaceae*). The shift  
422 in bacterial community structure was supported by SIMPER analysis showing that

423 *Rhodobacteriaceae* and *Comamonadaceae* were more frequent in the bacterial community  
424 associated with jellyfish at the peak of the bloom, and *Rhodobacteriaceae*, *Vibrionaceae*, and  
425 *Alteromonadaceae* in the bacterial community associated with senescent jellyfish (S8 Table).

426

### 427 **Culturable bacterial community composition**

428

429 Altogether, 135 bacteria were isolated from the exumbrella surface and gastral cavity of  
430 jellyfish, sampled during the peak of jellyfish population (AK1, AK3, AK6, AG1, AG6), and  
431 at the end of the blooming period (AK8, AK10, AK11, AG8, AG11). Regarding the  
432 morphology of bacterial colonies, we detected nine morphotypes in May, and only three  
433 morphotypes in June. The estimated abundance of cultural bacteria associated to jellyfish  
434 exumbrella was 1.9 CFU/cm<sup>2</sup> in May, and 2.0 CFU/cm<sup>2</sup> in June. Identification of 16S rRNA  
435 gene sequence revealed that across all samples, bacteria predominantly belonged to  
436 *Proteobacteria* (*Gammaproteobacteria* followed by *Alphaproteobacteria* and  
437 *Betaproteobacteria*), *Actinobacteria*, and *Firmicutes* (*Bacilli*) (exhibiting  $\geq 97\%$  identity to  
438 previously described bacterial species). Analysis of bacterial isolates again showed significant  
439 differences between seawater and jellyfish-associated communities (ANOSIM, global  
440  $R=0.393$ ,  $p < 0.05$ ) (Fig 3), with seawater communities being more diverse (Fig 4, S6 Table).  
441 *Gammaproteobacteria* (mostly *Vibrio* and *Pseudoalteromonas*) dominated the exumbrella  
442 surface-associated community (up to 100%) and the community of gastral cavity ( $> 60\%$ ), while  
443 bacterial isolates obtained from ambient seawater were mainly affiliated with  
444 *Alphaproteobacteria* (88% in May and 42% in June, mostly *Erythrobacter*  
445 (*Erythrobacteraceae*) and *Brevundimonas* (*Caulobacteraceae*)), followed by  
446 *Gammaproteobacteria* (32%, mostly *Halomonas* (*Halomonadaceae*), *Idiomarina*  
447 (*Idiomarinaceae*)) and *Actinobacteria* (25%, *Brevibacterium* (*Brevibacteriaceae*)) which were  
448 more abundant in June (Fig 4, S2 Table). According to SIMPER analysis, *Erythrobacter*,  
449 *Brevibacterium*, and *Brevundimonas* contributed the most to the difference between jellyfish-  
450 associated and water communities (S4 Table).

451

452 **Fig 3. Cluster analysis based on culturable fraction of bacterial community associated**  
453 **with *Aurelia* jellyfish.**

454 AK- jellyfish exumbrella surface, AG- mucus from gastral cavity and W- ambient seawater.  
455 Samples were collected in May (grey squares) and June (inverted black triangles). The  
456 dendrogram was inferred with the group average algorithm, based on the Bray–Curtis similarity  
457 matrix of arcsine transformed averaged abundances. Grey branches do not differ significantly  
458 (SIMPROF test,  $p > 0.05$ ).

459

460

461 **Fig 4. Bacterial isolates obtained from *Aurelia* jellyfish and ambient seawater.**

462 (A) Bacterial isolates obtained from jellyfish exumbrella surface (AK1, AK3, AK6), gastral  
463 cavity (AG1, AG6) and seawater (W\_May) in May in the Gulf of Trieste. (B) Bacterial isolates  
464 obtained from exumbrella surface (AK8, AK10, AK11) and gastral cavity (AG8, AG11) of  
465 jellyfish and seawater (W\_Jun) in June in the Gulf of Trieste. Cumulative column charts  
466 represent relative abundances of bacterial genus and area chart in the background represent  
467 relative abundances of major bacterial groups and *Proteobacteria* class. Taxa with relative  
468 abundance of < 3% across all samples are subsumed under Other Bacteria..

469

470

471 Differences between culturable bacterial communities of different body parts were small.  
472 Bacterial communities associated with jellyfish exumbrella at the time of population peak were  
473 dominated by *Gammaproteobacteria* (from 44.4% up to 100%), while *Alphaproteobacteria* and  
474 *Actinobacteria* represented up to 22.2% of the community (Fig 4A). Small percentages of  
475 isolates belonged to *Betaproteobacteria* (11%, exclusively *Delftia Comamonadaceae*) *Bacilli*  
476 (9%; mostly *Exiguobacterium*) and *Bacterioidetes* (12.5%). Considering the main  
477 representatives within *Gammaproteobacteria*, *Vibrio* (*Vibrionaceae*), *Pseudoalteromonas*  
478 (*Pseudoalteromonadaceae*), and *Stenotrophomonas* (*Xanthomonadaceae*) dominated, but also  
479 *Pseudomonas* (*Pseudomonadaceae*), *Alteromonas* (*Alteromonadaceae*), and *Psychrobacter*  
480 (*Moraxellaceae*) were detected. Representatives of *Alphaproteobacteria* were mostly  
481 *Labrenzia* and *Phaeobacter* (*Rhodobacteraceae*), and representatives of *Actinobacteria* mostly  
482 *Kocuria* (*Micrococcaceae*) and *Microbacterium* (*Microbacteriaceae*) (Fig 4A, S2 Table). The  
483 composition of bacterial communities in jellyfish gastral cavity was similarly dominated by  
484 *Gammaproteobacteria* (> 60%), followed by *Alphaproteobacteria* (up to 40%) and  
485 *Betaproteobacteria* and *Bacilli* (both 10%). The population of *Gammaproteobacteria* was  
486 dominated by *Pseudoalteromonas* followed by *Pseudomonas*, *Vibrio*, and *Stenotrophomonas*  
487 (Fig 4A, S2 Table).

488

489 Changes in culturable bacterial community composition, presumably related to jellyfish  
490 population decay, at the end of blooming period were significant (ANOSIM, global R= 0.362,  
491 p< 0.05). Changes were evident as there was even more pronounced dominance of  
492 *Gammaproteobacteria* (from 66.7% up to 100%) in communities associated to jellyfish  
493 exumbrella and of gastral cavity (Fig 4B). Within the *Gammaproteobacterial* population,  
494 predominant community members *Pseudoalteromonas*, *Stenotrophomonas*, and *Pseudomonas*  
495 almost or completely ‘disappeared’, and *Vibrio* became highly dominant or even formed a  
496 monoculture representative (Fig 4B, S2 Table). The change in community structure towards  
497 *Vibrio* was also confirmed by SIMPER analysis (S9 Table). Consequently, the prevalence of  
498 *Vibrio* also resulted in lower diversity (S6 Table).



499

## 500 Discussion

### 501 *Aurelia* associated bacterial community

#### 502 *Comparison of jellyfish-associated and ambient seawater bacterial community composition*

503 Our results on bacterial community composition, assessed by culture-dependent and cultural-  
504 independent approaches, demonstrated significant differences between bacterial community  
505 associated with *Aurelia* and the ambient seawater bacterial assemblage. Phylogenetic analysis  
506 showed a wide diversity of bacterial community associated with jellyfish, including members  
507 of Proteobacteria (*Alpha*-, *Gamma*-, and *Beta*-proteobacteria), which dominated the  
508 community, and members of *Actinobacteria* and *Cyanobacteria*. Ambient seawater bacterial  
509 communities were more diverse, and dominated by three bacterial phyla: *Proteobacteria*,  
510 *Flavobacteria*, and *Cyanobacteria*. Also, within Proteobacterial groups associated with  
511 jellyfish and the one detected within ambient seawater assemblage, had different taxonomic  
512 affiliations, and the dominance or exclusivity of only one taxon was hardly present.

513 Similar observations of the jellyfish-specific bacterial community, distinct from the community  
514 in ambient seawater, were reported previously for *A. aurita* [18,27] and also other marine  
515 animals [45]. Since associated bacterial assemblages differed from the ambient seawater  
516 bacterial community, and from bacteria associated with other types of substrates/surfaces found  
517 in the water column, it was suggested that associations with animals might be specific to some  
518 degree [45]. According to Taylor *et al.* [73] sponge bacterial associates could be separated/split  
519 into three groups: (i) bacterial specialists - found on only one host species; (ii) host associates -  
520 found on multiple hosts; and (iii) generalists - found on multiple hosts and within the seawater  
521 community. In our study most bacteria associated with *Aurelia* were not detected in the ambient  
522 seawater, however, they were closely related to bacteria previously found in association with  
523 other host animals (exhibiting at least 97% similarity), indicating that this relationship is not  
524 host-specific. Previous studies on *A. aurita* bacterial associates also did not reveal the presence  
525 of any *Aurelia*-bacterial specialists, with the exception of *Mycoplasma* sp. (class *Mollicutes*), a  
526 possible/hypothetical endosymbiont [18,27]. However, in our study, we were not able to detect  
527 any *Mycoplasma* members. In addition, bacterial community composition was very different to  
528 the community associated with *A. aurita* from the North West Atlantic and the Baltic Sea  
529 [18,27]. This might suggest the possible effect of host genetics background (different  
530 populations of *Aurelia* species in geographically distant locations), and also the important's of  
531 environmental and anthropogenic conditions, determining the presence, activity, and  
532 composition of bacterial community in jellyfish's environment.

533 We found another interesting result, which is the consistently unsuccessful amplification of  
534 bacterial 16S rRNA genes from jellyfish samples, unless an additional nested PCR reaction was  
535 performed. Problems with DNA amplification were reported before in the analyses of the tissue  
536 of healthy corals, and were attributed to the low abundance of bacterial associates [74],  
537 confirming previous observation of rare isolated bacterial cells within coral tissue by in situ  
538 hybridization [75]. This indicates that unsuccessful DNA amplification in our study also could  
539 be the consequence of the overall low bacterial number on jellyfish exumbrella, the oral arm



540 surface, and in the gastral cavity. The speculations on the low number of *Aurelia* jellyfish-  
541 associated bacteria, was also confirmed by scanning electron microscopy of the adult medusa  
542 umbrella surface in our parallel study (data not shown). Our results show that the surface was  
543 covered with mucus, and we observed mucus secretions in the form of flocs on all external  
544 surfaces, but with no bacteria observed. Unlike the epidermal umbrella surface, the examination  
545 of mucus secreted from exumbrella surface, revealed the presence of considerable amounts of  
546 bacteria (data not shown). Using the same microscopic method, Johnston and Rohwer [76]  
547 similarly found that external cell layers of coral are invariably clean of adhering microbes. They  
548 did, however, suggest the possibility of a dynamic community hovering in the boundary layers  
549 above the coral epidermis. So, the possibility that the majority of bacteria dwell in mucus  
550 produced by medusa rather than being present within the mesoglea or attached to epidermis is  
551 also in agreement with observations by Weiland-Bräuer *et al.* [27], detecting the majority of  
552 bacteria located on the outer surface of coating mucus, covering *A. aurita* polyps. This could  
553 also support our results of bacterial colonies grown after imprints of jellyfish surfaces on agar  
554 plates, where it was estimated CFU less than two bacterial colonies/cm<sup>2</sup> of jellyfish surface in  
555 May and June. The presence of rare bacterial cells could be due to the fact that adult medusa  
556 has evolved mechanisms of defense against epibiotic organisms. One type of mechanism could  
557 be the production of antibacterial peptide aurelin, extracted from mesoglea of *A. aurita* [42].  
558 Based on that, we can speculate that *A. aurita* is a ‘hostile’ environment for bacteria. It is also  
559 known that jellyfish surfaces, including *A. aurita*, are covered by a constantly renewing mucus  
560 layer, which was found to have implications in surface cleaning and defense against predators  
561 [39–41]. Similarly as Garren and Azam [77] demonstrated for corals, surface cleaning by mucus  
562 production could be used by jellyfish to regulate an abundance of bacterial associates. Even  
563 more so, during certain conditions, including stress, the mucus production is more pronounced  
564 [41]. In our study, extensive mucus release (from surface and gastral cavity) was detected  
565 during the processing of jellyfish, possibly leading to bacterial loss and low bacterial numbers  
566 of jellyfish associates in our samples.

567 Despite being rare, the total and the culturable part of the bacterial community associated with  
568 *Aurelia* jellyfish from the Gulf of Trieste was found to be diverse. It was composed mostly of:  
569 (i) bacteria belonging to genus *Ruegeria*, *Phaeobacter*, and *Pseudoalteromonas*, known for  
570 their extraordinary ability to successfully compete and colonize surfaces, and also to enhance  
571 survival chances of the host organism [78–81]; (ii) bacteria belonging to genus *Alteromonas*  
572 and *Vibrio*, known as particle and surface colonizers with the ability to degrade and utilize a  
573 broad spectrum of organic substrates [81]; and (iii) bacteria belonging to genus  
574 *Stenotrophomonas*, *Burkholderia*, and *Achromobacter*, mostly known as medically important  
575 strains, but also with high bioremediation potential due to ability of PAHs and xenobiotic  
576 degradation and with broad antibiotic resistance [82–87]. With the exception of *Ruegeria*,  
577 *Burkholderia*, and *Achromobacter*, other bacteria were also recovered by culturing. The  
578 presence of *Ruegeria* and *Phaeobacter* (*Alphaproteobacteria* - *Roseobacter* clade) and  
579 *Pseudoalteromonas*, *Alteromonas*, and *Vibrio* (*Gammaproteobacteria*) is not surprising, since  
580 they are known as successful and dominant particle/surface colonizers [80,88,89], and regularly  
581 associated with marine sponges [4], corals (tissue and mucus) [8,9,13,90–93], and ctenophores  
582 [18,20,94]. A more interesting feature of *Aurelia* jellyfish associated bacterial community was

583 the high relative abundance of *Burkholderia* and *Achromobacter* (*Betaproteobacteria*). This  
584 group is not characteristic of a marine environment but was found in environments  
585 characterized with lower salinity and higher nutrient concentrations, such as estuaries [95].  
586 *Betaproteobacteria* were also found in association with sponges [3,5,96], corals [9,11,12],  
587 ctenophores [19,94], and cnidarian Hydra [97], but, with the exception of the last, their relative  
588 abundances were lower than in our study. Of the above bacterial taxa, only *Phaeobacter*, *Vibrio*,  
589 and *Pseudoalteromonas* were previously found in association with *A. aurita* [18,27,33].

590

#### 591 *The bacterial community composition associated with different body parts of jellyfish*

592 Bacterial community composition differed significantly between different *Aurelia* medusa body  
593 parts, especially the one within the gastral cavity. The communities of exumbrella and oral arms  
594 shared dominant bacterial groups, *Alphaproteobacteria* followed by *Gammaproteobacteria*,  
595 while the community in the gastral cavity was dominated by *Betaproteobacteria*, followed by  
596 *Gammaproteobacteria* and *Actinobacteria*. Within *Alphaproteobacteria*, bacterial communities  
597 of the exumbrella surface and oral arms were affiliated with *Phaeobacter*, *Ruegeria*, and within  
598 *Gammaproteobacteria* with *Stenotrophomonas*, *Alteromonas*, *Pseudoalteromonas*, and *Vibrio*.  
599 In the gastral cavity were members of *Betaproteobacteria* affiliated with *Burkholderia*,  
600 *Cupriavidus*, and *Achromobacter*. Members of *Gammaproteobacteria* affiliated mostly with  
601 *Pseudomonas*, and members of *Actinobacteria* with *Kocuria*.

602 In contrast to the total bacterial community, bacteria isolated from jellyfish (from both the  
603 exumbrella surface and gastral cavity) were mostly affiliated with *Gammaproteobacteria*,  
604 within the most relevant members affiliated with *Vibrio*, *Stenotrophomonas*, and  
605 *Pseudoalteromonas*. The observed dominance of different bacterial classes within the total  
606 bacterial community and cultured bacterial community in our study is not that surprising, since  
607 both culturing and molecular-based methods are biased towards certain microbial groups.  
608 Similar observations, were reported previously by Rohwer [11] studying coral-associated  
609 bacterial communities. In addition, the culturing approach revealed the presence of bacteria  
610 affiliated with *Microbacterium* (*Microbacteriaceae*), *Sphingobacterium*  
611 (*Sphingobacteriaceae*), *Brevundimonas* (*Caulobacteraceae*), and *Delftia* (*Comamonadaceae*).  
612 However, considering the main representatives within bacterial groups, molecular-based  
613 studies and the culture-dependent method more or less pointed to the presence/dominance of  
614 the same bacterial taxa.

615 The pronounced difference in composition between gastral cavity bacterial community and  
616 communities of exumbrella and oral arms surface could be the consequence of different  
617 surface/epithelial structures and their function. Exumbrella and oral arms are densely covered  
618 with cilia. The epidermis contains numerous mucus cells, especially in densely ciliated area  
619 [39]. Mucus cells were thought to contribute to the constantly renewing mucus layer involved  
620 in surface cleaning [40], and potentially controlling the density of associated bacteria. The  
621 exumbrella and oral arms surfaces are in constant contact with bacteria in surrounding ambient  
622 seawater, attracted by secreted mucus, which is potentially a high quality energy source and  
623 settling niche. The bacteria of genus *Phaeobacter* and genus *Ruegeria*, which belongs to

624 *Silicibacter-Ruegeria* subgroup, are members of *Roseobacter* clade, known as the successful  
625 surface colonizers, and as the fastest utilizers of nutrients in the marine environment [80]. They  
626 produce acylated homoserine lactons (AHLs), the quorum-sensing signals involved in biofilm  
627 formation and function [80]. Besides the production of broad range biologically active  
628 metabolites, bacteria of the *Pseudoalteromonas* genus produce extracellular enzymes and  
629 exopolysaccharides, which all together enable them to successfully compete for nutrients and  
630 colonization of surfaces [79]. Bacteria of *Alteromonas* and *Vibrio* genus are widespread in the  
631 marine environment and are common surface and particle colonizers [81]. *Alteromonas*  
632 produces and secretes a variety of extracellular enzymes that contribute to the hydrolysis of  
633 biopolymers, including polysaccharides, proteins, nucleic acids, and lipids, which are the major  
634 components of marine organic particles [81]. According to Allers *et al.* [98], their versatile  
635 metabolism helps them exploit a complex substrate source, such as coral mucus, which in  
636 composition resembles to mucus produced by jellyfish *A. aurita* [43]. *Vibrio* species are major  
637 chitin utilizers, largely contributing to global carbon and nitrogen cycling. Although association  
638 with insoluble chitinous surface of detritus and life zooplankton is a preferable lifestyle for  
639 vibrios [81], they were found in association with other marine animals, including jellyfish, and  
640 there are indices that could be highly enriched in the seawater at the end of the jellyfish blooms  
641 [33]. Ritchie [90] characterized the *Vibrio* species more as ‘visitors’ than true residents, and as  
642 commensal microorganisms that can potentially become opportunistic under certain conditions.  
643 *Vibrio coralliilyticus* was found in high abundances in coral tissue slurry [9] and proven to  
644 infect and cause tissue damage in corals at higher temperatures [99]. The *Stenotrophomonas*  
645 genus was usually represented in low abundances in communities associated with marine  
646 animals [3,5,9], but found to be producing antimicrobial compounds [100]. Otherwise,  
647 *Stenotrophomonas* species are found in many environments, but mostly associated with  
648 terrestrial plants that provide plant protection and growth promotion. They were also found to  
649 be resistant to heavy metals and antibiotics, and to degrade pollutants like polycyclic aromatic  
650 hydrocarbons (PAHs) and xenobiotics [85].

651 In contrast, the gastral cavity is somehow isolated from the surrounding environment. The  
652 gastral cavity surface is covered by finger-like villi, with numerous cilia at their apical region,  
653 and with vesiculous receptacles at the basal region. Mucus cells in the gastrodermis are present  
654 mostly at the apical region of the villi, while gastrodermis at the basal region is composed  
655 mainly by serous cells, producing digestive enzymes [39]. As a niche, the jellyfish ‘gut’ could  
656 somehow impose strict requirements of bacteria to survive. Studies on *Cotylorhiza tuberculata*  
657 showed possible intracellular symbiotic bacteria within organs of the gastral cavity (gastric  
658 filaments), with possible involvement in the digestion process [26]. The dominance of  
659 *Betaproteobacteria* in medusa gastral cavity detected within our study is somehow surprising,  
660 since they are more characteristic for organic aggregates in limnetic ecosystems [89]. However,  
661 bacteria of the *Burkholderia* and *Achromobacter* genus were also isolated from the marine  
662 environment, including animals [83,87]. Both were found to be able to degrade PAHs and to be  
663 resistant to multiple antibiotics [82–84,86,87]. Similarly, *Achromobacter* species were found to  
664 be n- alkane degrader and to remove also anthracene, phenanthrene, and pyrene from the  
665 environment [82]. In addition, *Achromobacter* sp. HZ01 possesses genes related to the  
666 metabolism of secondary metabolites [83]. The *Cupriavidus* species were not detected in the

667 marine environment, to our knowledge, however they were attributed with the ability to degrade  
668 aliphatic hydrocarbons [101]. Similarly, were the marine *Pseudomonas* species found to be able  
669 to degrade hydrocarbons like naphthalene, present within petroleum [86,102]. However, they  
670 were also found in association with sponges, producing antimicrobial compounds [2,100].  
671 *Kocuria* isolated from marine sponges were found to produce the antibiotic kocurin, active  
672 against *Staphylococcus aureus* (MRSA) [103,104]. Even more so, *Kocuria* isolated from the  
673 marine environment was found to be able to utilize polyethylene as a sole carbon source [105].  
674 The Gulf of Trieste, an ecosystem where *Aurelia* used in our study was collected, is known to  
675 be impacted by different anthropogenic pressures. Consequently, the sediment and the water  
676 column is polluted with PAHs and other chemical compounds [106] as well as by faecal  
677 bacteria, originating from coastal run off and municipal wastewater discharges [106]. This  
678 suggests that the bacterial community associated with jellyfish from this environment could be  
679 adapted to such environmental conditions. Furthermore, supporting our hypothesis, polyps  
680 generating *Aurelia* medusa were previously found attached to artificial structures such as port  
681 pillars [107]. This indicates that pollution adapted bacterial community could evolved and  
682 prosper at polyp and medusa stages. This altogether suggests possible impact of anthropogenic  
683 pollution on the structure of bacterial community associated with jellyfish and possible  
684 adaptation mechanism of jellyfish associated bacterial population.

685 Hosts recruit bacteria, which are beneficial for their development or contribute to their well-  
686 being. Selection of certain bacteria in different medusa body parts could be the strategy of  
687 *Aurelia*, to harbor bacteria with specific functions needed in different body parts. Bacterial  
688 associates found on *Aurelia* exumbrella and oral arms surface were previously supposed to  
689 assist in host defense against pathogens and fouling organisms from surrounding seawater  
690 [13,93,108,109]. This is not surprising, since *Vibrio* and pigmented strains of *Phaeobacter*,  
691 *Ruegeria*, and *Pseudoalteromonas* produce antimicrobial compounds when attached to live or  
692 inert surfaces [44,109–112]. In addition, some of extracellular compounds produced by  
693 *Pseudoalteromonas* bacteria were found to enhance the chances of host organisms to survive  
694 in specific marine habitats [79]. Apprill *et al.* [78] even proposed possible role of  
695 *Pseudoalteromonas* in coral planula settlement and adhesion process, while were the  
696 *Roseobacter* clade bacteria supposed to be important in coral development. The role in host  
697 defense was also proposed for bacteria of *Stenotrophomonas*, detected within all body part  
698 communities and for *Pseudomonas* [2,100], and *Actinobacteria* [103,113], present within the  
699 gastral cavity. However, bacteria in ‘digestive system’ should be more involved in food  
700 digestion and nutrition, which is reasonable, since jellyfish are supposed to ‘lack’ some  
701 digestive enzymes to utilize prey [114]. An especially intriguing ability of the gastral cavity  
702 bacteria is degradation of PAH’s, xenobiotics, and plastic. Jellyfish mucus was found to have  
703 structural properties to effectively accumulate nanoparticles [40] and PAHs [115]. This  
704 property could be also applied to entrap micro- plastic particles, which was demonstrated for  
705 corals [116]. PAHs were found to be highly toxic for zooplankton organisms, however, adult  
706 medusa *A. aurita* and *M. leidy* showed a higher tolerance to exposure [117]. *A. aurita* under  
707 stress conditions, release blobs of mucus [41], detected also under exposure to crude oil  
708 (containing PAHs) [115]. This suggests that sloughing as a possible way to reduce the toxic  
709 effect of crude oil. In addition, when PAHs were entrapped within jellyfish mucus,



710 hydrocarbon-degrading bacteria cell densities doubled, which resulted in a significant increase  
711 in oil degradation [115]. Some of toxic particles, entrapped within mucus and covered with  
712 degrading bacteria, could be also transferred by ciliary currents and boundary layer flow to a  
713 marginal umbrella groove, and then to gastral cavity, since this is one type of prey capture  
714 recognized for *A. aurita* [114], which could explain high abundances of hydrocarbon and plastic  
715 degrading bacteria found in the gut of *Aurelia* jellyfish within our study. Even more so, since  
716 toxic compounds are utilized by associated bacteria, less are accumulated within jellyfish tissue  
717 and are not transferred to higher trophic levels.

718

### 719 **Bacterial community structure shifts due to jellyfish *Aurelia* population collapse**

720 The shift in bacterial community composition within a one-month period (from May to June)  
721 was observed. It resulted in a higher abundance of *Gammaproteobacteria*, especially *Vibrio*,  
722 which became a dominant member of community. This shift towards *Vibrio* was even more  
723 evident in cultural bacterial community.

724 The major difference between both studied months was a rise in the temperature and the  
725 viability state of *Aurelia* jellyfish in the Gulf of Trieste. In June was the end of blooming period  
726 and jellyfish were in the phase of dying, which was evident as typical signs of moribund  
727 jellyfish: degenerated tentacles, oral structures, and gonads, reduced swimming ability and  
728 necrosis of the epithelial bell tissue [118]. The process is normally triggered by environmental  
729 stress like change in temperature or salinity, food availability, parasitism, and spawning or even  
730 more likely, interacting stressors [118]. Nevertheless, in summer, the greater part of the *Aurelia*  
731 jellyfish population was found to be parasitized, along with altered morphology, growth, and  
732 swimming pattern in the Big Lake (Mljet Island, Croatia) [119]. This could indicate that  
733 jellyfish defense mechanism was probably disturbed due to environmental stress (higher  
734 temperature), which resulted in parasitism and mortality.

735 The senescing process in jellyfish indirectly affects interaction between jellyfish (host) and  
736 bacterial associates, which leads to a shift in the associated microbial community. Moribund  
737 jellyfish, without their own defense mechanisms, represent organic rich particles, where the  
738 structure of associated bacterial community is influenced solely by bacterium-bacterium  
739 antagonism and environmental conditions, determining the presence of metabolically active  
740 bacteria. Jellyfish tissue was found to be high quality labile organic substrate for bacteria [33-  
741 35]. Previous bacterial degradation experiments performed on *Aurelia* jellyfish in the Gulf of  
742 Trieste, resulted in the increase in *Vibrio* abundance [33].

743 *Vibrio* was recognized before as ‘visitor,’ exploiting the nutrient-rich niche [90]. As such, this  
744 commensal microorganism probably dwells in the ‘cloud’ of jellyfish mucus and under the right  
745 conditions becomes opportunistic. Vibrios rapidly grow in organic-rich environments [120],  
746 and together with tolerance to higher temperature [121] (documented in June in the Gulf of  
747 Trieste), up-regulating virulence determinants such as motility, resistance to antimicrobial  
748 compounds, hemolysis, and cytotoxicity detected in coral pathogens [81] and the references  
749 within), it can outcompete other bacterial residents and become highly dominant.

750

## 751 **Conclusion**

752

753 Both culture-dependent and independent methods have been extensively used to study and to  
754 understand the role of microbial communities associated with marine animals, especially  
755 crustacean zooplankton, and benthic sponges and corals. Data available on *A. aurita* are still  
756 limited. With the exception of *Mycoplasma* bacteria, a possible endosymbiont detected within  
757 *A. aurita* tissue [18,27], the nature of the relationship between *Aurelia* jellyfish and bacterial  
758 associates is not straight forward. In addition, it is hard to say whether or not these bacteria are  
759 true residents of jellyfish, forming a species-specific association with the host or are just  
760 opportunistic microbes residing in niche of an organically- rich environment. So far, we only  
761 speculate on the role of bacterial associates, although Weiland-Bräuer *et al.* [27] suggested  
762 associated bacteria may play important functional roles during the life cycle of *A. aurita*.

763 Bacteria associated with *Aurelia* jellyfish in the Gulf of Trieste were found to be mostly  
764 generalists, composing for the host beneficial assemblage possibly involved in food digestion  
765 and protection from toxic compounds, pathogens, and other fouling organisms. With  
766 speculation on the active and passive role of *Aurelia* jellyfish in selection of bacterial associates,  
767 demonstrated for other animals [45], jellyfish may form a relationship with diverse  
768 metabolically active microorganisms, providing more effective adaptation of host to changing  
769 environmental and anthropogenic conditions. From this perspective, the relationship somehow  
770 resembles suggested coral probiotic theory [122].

771 Further investigation of such a relationship is necessary to understand the relevance of the  
772 associated bacteria for the host during its life span and during/after the bloom period, especially  
773 in areas experiencing seasonal blooms, influencing food webs, and biogeochemical cycles in  
774 those regions. Even more so, despite the small number of experimental data, our results suggest  
775 that the jellyfish - bacteria link could be applied as an effective pollution- control method in  
776 marine environments affected by crude oil and micro plastic. Finally, we would also like to  
777 emphasize the importance of culturing organisms. Although the method is biased towards  
778 certain bacterial groups, it remains important to obtain complete genome sequences, to identify  
779 properties of organisms, and to help understand the biology and ecology of microbial species.

780

## 781 **Acknowledgments**

782 We would like to thank R/V Sagita crew and Dr. Mateja Grego for her help with Primer v6  
783 analyses. We are grateful to anonymous reviewers for their critical and valuable comments on  
784 the manuscript.

785



## 786 References

- 787
- 788 1. Apprill A. Marine Animal Microbiomes: Toward understanding host–microbiome  
789 interactions in a changing ocean. *Front Mar Sci.* 2017;4(July):1–9. Available from:  
790 <http://journal.frontiersin.org/article/10.3389/fmars.2017.00222/full>
- 791 2. Thakur NL, Anil AC. Antibacterial activity of the sponge *Ircinia ramosa*: Importance  
792 of its surface- associated bacteria. *J Chem Ecol.* 2000;26(1):57–71.
- 793 3. Radwan M, Hanora A, Zan J, Mohamed NM, Abo- Elmatty DM, Abou-El-Ela SH, et  
794 al. Bacterial community analyses of two Red Sea sponges. *Mar Biotechnol.*  
795 2010;12:350–60.
- 796 4. Webster NS, Negri AP, Munro MMHG, Battershill CN. Diverse microbial  
797 communities inhabit Antarctic sponges. *Environ Microbiol.* 2004;6(3):288–300.
- 798 5. Li ZY, He LM, Wu J, Jiang Q. Bacterial community diversity associated with four  
799 marine sponges from the South China Sea based on 16S rDNA-DGGE fingerprinting. *J*  
800 *Exp Mar Bio Ecol.* 2006;329(1):75–85.
- 801 6. Hentschel U, Hopke J, Horn M, Friedrich AB, Wagner M, Hacker J, et al. Molecular  
802 Evidence for a uniform microbial community in sponges from different oceans. *Appl*  
803 *Environ Microbiol.* 2002;68(9):4431–40.
- 804 7. Kittelmann S, Harder T. Species- and site-specific bacterial communities associated  
805 with four encrusting bryozoans from the North Sea, Germany. *J Exp Mar Bio Ecol.*  
806 2005;327(2):201–9.
- 807 8. Koren O, Rosenberg E. Bacteria Associated with Mucus and Tissues of the Coral  
808 *Oculina patagonica* in Summer and Winter. *Appl Environ Microbiol.*  
809 2006;72(8):5254–9. Available from: [http://aem.asm.org/cgi/doi/10.1128/AEM.00554-](http://aem.asm.org/cgi/doi/10.1128/AEM.00554-06)  
810 06
- 811 9. Bourne DG, Munn CB. Diversity of bacteria associated with the coral *Pocillopora*  
812 *damicornis* from the Great Barrier Reef. *Environ Microbiol.* 2005;7(8):1162–74.
- 813 10. Rohwer F, Seguritan V, Azam F, Knowlton N. Diversity and distribution of coral-  
814 associated bacteria. *Mar Ecol Prog Ser.* 2002;243:1–10.
- 815 11. Rohwer F, Breitbart M, Jara J, Azam F, Knowlton N. Diversity of bacteria associated  
816 with the Caribbean coral *Montastraea franksi*. *Coral Reefs.* 2001;20(1):85–91.
- 817 12. Webster NS, Bourne D. Bacterial community structure associated with the Antarctic  
818 soft coral, *Alcyonium antarcticum*. *FEMS Microbiol Ecol.* 2007;59:81–94.
- 819 13. Harder T, Lau SCK, Dobretsov S, Fang TK, Qian P-Y. A distinctive epibiotic bacterial  
820 community on the soft coral *Dendronephthya* sp. and antibacterial activity of coral  
821 tissue extracts suggest a chemical mechanism against bacterial epibiosis. *FEMS*  
822 *Microbiol Ecol.* 2003;43:337–47.
- 823 14. Tang KW, Turk V, Grossart H. Linkage between crustacean zooplankton and aquatic  
824 bacteria. *Aquat Microb Ecol.* 2010;61(3):261–77.
- 825 15. Gerdt G, Brandt P, Kreisel K, Boersma M, Schoo KL, Wichels A. The microbiome of  
826 North Sea copepods. *Helgol Mar Res.* 2013;67(4):757–73.
- 827 16. Grossart HP, Riemann L, Tang KW. Molecular and functional ecology of aquatic  
828 microbial symbionts. *Front Microbiol.* 2013;4(MAR):2012–3.
- 829 17. Flood PR. Architecture of, and water circulation and flow rate in, the house of the  
830 planktonic tunicate *Oikopleura labradorensis*. *Mar Biol.* 1991;111:95–111.
- 831 18. Daley MC, Urban-Rich J, Moisaner PH. Bacterial associations with the hydromedusa  
832 *Nemopsis bachei* and scyphomedusa *Aurelia aurita* from the North Atlantic Ocean.  
833 *Mar Biol Res.* 2016;12(10):1088–100.
- 834 19. Daniels C, Breitbart M. Bacterial communities associated with the ctenophores  
835 *Mnemiopsis leidyi* and *Beroe ovata*. *FEMS Microbiol Ecol.* 2012;82(1):90–101.
- 836 20. Dinasquet J, Granhag L, Riemann L. Stimulated bacterioplankton growth and selection  
837 for certain bacterial taxa in the vicinity of the ctenophore *Mnemiopsis leidyi*. *Front*  
838 *Microbiol.* 2012;3(AUG):1–8.
- 839 21. Hao W. Bacterial communities associated with jellyfish. Bremen University; 2014.
- 840 22. Cleary DFR, Becking LE, Polónia ARM, Freitas RM, Gomes NCM. Jellyfish-  
841 associated bacterial communities and bacterioplankton in Indonesian Marine lakes.  
842 *FEMS Microbiol Ecol.* 2016;92(5):1–14.

- 843 23. Cortés-Lara S, Urdiain M, Mora-Ruiz M, Prieto L, Rosselló-Móra R. Prokaryotic  
844 microbiota in the digestive cavity of the jellyfish *Cotylorhiza tuberculata*. *Syst Appl*  
845 *Microbiol.* 2015;38(7):494–500. Available from:  
846 <http://dx.doi.org/10.1016/j.syapm.2015.07.001>
- 847 24. Delannoy CMJ, Houghton JDR, Fleming NEC, Ferguson HW. Mauve Stingers (*Pelagia noctiluca*) as carriers of the bacterial fish pathogen *Tenacibaculum*  
848 *maritimum*. *Aquaculture.* 2011;311(1–4):255–7. Available from:  
849 <http://dx.doi.org/10.1016/j.aquaculture.2010.11.033>
- 850 25. Ferguson HW, Delannoy CMJ, Hay S, Nicolson J, Sutherland D, Crumlish M. Jellyfish  
851 as vectors of bacterial disease for farmed salmon (*Salmo salar*). *J Vet Diagn Invest.*  
852 2010;22:376–82.
- 853 26. Viver T, Orellana LH, Hatt JK, Urdiain M, Díaz S, Richter M, et al. The low diverse  
854 gastric microbiome of the jellyfish *Cotylorhiza tuberculata* is dominated by four novel  
855 taxa. *Environ Microbiol.* 2017;19(8):3039–58.
- 856 27. Weiland-Bräuer N, Neulinger SC, Pinnow N, Künzel S, Baines JF, Schmitz RA.  
857 Composition of bacterial communities associated with *Aurelia aurita* changes with  
858 compartment, life stage, and population. *Appl Environ Microbiol.* 2015;81(17).
- 859 28. Schuett C, Doepke H. Endobiotic bacteria and their pathogenic potential in cnidarian  
860 tentacles. *Helgol Mar Res.* 2010;64:205–12.
- 861 29. Riemann L, Titelman J, Båmstedt U. Links between jellyfish and microbes in a  
862 jellyfish dominated fjord. *Mar Ecol Prog Ser.* 2006;325(2003):29–42.
- 863 30. Manzari C, Fosso B, Marzano M, Annese A, Caprioli R, D’Erchia AM, et al. The  
864 influence of invasive jellyfish blooms on the aquatic microbiome in a coastal lagoon  
865 (Varano, SE Italy) detected by an Illumina-based deep sequencing strategy. *Biol*  
866 *Invasions.* 2015;17(3):923–40.
- 867 31. Condon RH, Steinberg DK, del Giorgio PA, Bouvier TC, Bronk DA, Graham WM, et  
868 al. Jellyfish blooms result in a major microbial respiratory sink of carbon in marine  
869 systems. *Proc Natl Acad Sci.* 2011;108(25):10225–30. Available from:  
870 <http://www.pnas.org/cgi/doi/10.1073/pnas.1015782108>
- 871 32. Blanchet M, Pringault O, Bouvy M, Catala P, Oriol L, Caparros J, et al. Changes in  
872 bacterial community metabolism and composition during the degradation of dissolved  
873 organic matter from the jellyfish *Aurelia aurita* in a Mediterranean coastal lagoon.  
874 *Environ Sci Pollut Res.* 2015; 22, 18: 13638-13653.
- 875 33. Tinta T, Kogovšek T, Malej A, Turk V. Jellyfish modulate bacterial dynamic and  
876 community structure. *PLoS One.* 2012;7(6):1–11.
- 877 34. Tinta T, Kogovšek T, Turk V, Shiganova TA, Mikaelyan AS, Malej A. Microbial  
878 transformation of jellyfish organic matter affects the nitrogen cycle in the marine water  
879 column - A Black Sea case study. *J Exp Mar Bio Ecol.* 2016;475:19–30.
- 880 35. Tinta T, Malej A, Kos M, Turk V. Degradation of the Adriatic medusa *Aurelia* sp. by  
881 ambient bacteria. *Hydrobiologia.* 2010;645:179–91.
- 882 36. Titelman J, Riemann L, Sørnes TA, Nilsen T, Griekspoor P, Båmstedt U. Turnover of  
883 dead jellyfish : stimulation and retardation of microbial activity. *Mar Ecol Prog Ser.*  
884 2006;325:43–58.
- 885 37. Pitt KA, Welsh DT, Condon RH. Influence of jellyfish blooms on carbon , nitrogen and  
886 phosphorus cycling and plankton production. *Hydrobiologia.* 2009;616:133–49.
- 887 38. Bosch TCG. Cnidarian-microbe interactions and the origin of innate immunity in  
888 Metazoans. *Annu Rev Microbiol.* 2013;67(1):499–518. Available from:  
889 <http://www.annualreviews.org/doi/10.1146/annurev-micro-092412-155626>
- 890 39. Heeger T, Möller H. Ultrastructural observations on prey capture and digestion in the  
891 scyphomedusa *Aurelia aurita*. *Mar Biol.* 1987;96(3):391–400.
- 892 40. Patwa A, Thiéry A, Lombard F, Lilley MKS, Boisset C, Bramard J, et al.  
893 Accumulation of nanoparticles in “jellyfish” mucus: a bio-inspired route to  
894 decontamination of nano- waste. *Nat Sci Reports.* 2015;1–8. Available from:  
895 <http://dx.doi.org/10.1038/srep11387>
- 896 41. Shanks A, Graham W. Chemical defense in a scyphomedusa. *Mar Ecol Prog Ser.*  
897 1988;45:81–6.
- 898 42. Ovchinnikova T V., Balandin S V., Aleshina GM, Tagaev A a., Leonova YF,  
899 Krasnodembsky ED, et al. Aurelin, a novel antimicrobial peptide from jellyfish *Aurelia*  
900

- 901 *aurita* with structural features of defensins and channel-blocking toxins. *Biochem*  
902 *Biophys Res Commun.* 2006;348(2):514–23.
- 903 43. Ducklow HW, Mitchell R. Composition of mucus released by coral reef coelenterates.  
904 *Limnol Oceanogr.* 1979;24(4):706–14.
- 905 44. Long RA, Azam F. Antagonistic interactions among marine pelagic bacteria. *Appl*  
906 *Environ Microbiol.* 2001;67(11):4975–83.
- 907 45. Wahl M, Goecke F, Labes A, Dobretsov S, Weinberger F. The second skin: ecological  
908 role of epibiotic biofilms on marine organisms. *Front Microbiol.* 2012;3:1–21.
- 909 46. Ramšak A, Stopar K, Malej A. Comparative phylogeography of meroplanktonic  
910 species, *Aurelia* spp. and *Rhizostoma pulmo* (Cnidaria: Scyphozoa) in European Seas.  
911 *Hydrobiologia.* 2012;690(1):69–80.
- 912 47. Scorrano S, Aglieri G, Boero F, Dawson MN, Piraino S. Unmasking *Aurelia* species in  
913 the Mediterranean Sea: An integrative morphometric and molecular approach. *Zool J*  
914 *Linn Soc.* 2017;180(2):243–67.
- 915 48. Kogovšek T, Bogunović B, Malej A. Recurrence of bloom-forming scyphomedusae:  
916 Wavelet analysis of a 200-year time series. *Hydrobiologia.* 2010;645(1):81–96.
- 917 49. Malej A, Kogovšek T, Ramšak A, Catenacci L. Blooms and population dynamics of  
918 moon jellyfish in the northern Adriatic. *Cah Biol Mar.* 2012;53(3):337–42.
- 919 50. Kogovšek T, Klun K, Ikeda H, Tinta T, Uye S. Starvation - an important factor  
920 controlling scyphozoan population?. In: Fifth International Jellyfish Bloom  
921 Symposium : Abstract book. Barcelona: Barcelona University. 2016; 2016. p. 33.
- 922 51. Brotz L, Cheung WWL, Kleisner K, Pakhomov E, Pauly D. Increasing jellyfish  
923 populations: Trends in Large Marine Ecosystems. *Hydrobiologia.* 2012;690(1):3–20.
- 924 52. Condon RH, Graham WM, Duarte CM, Pitt KA, Lucas CH, Haddock SHD, et al.  
925 Questioning the rise of gelatinous zooplankton in the World's Oceans. *Bioscience.*  
926 2012;62(2):160–9. Available from:  
927 <http://bioscience.oxfordjournals.org/content/62/2/160.abstract>
- 928 53. Condon RH, Duarte CM, Pitt KA, Robinson KL, Lucas CH, Sutherland KR, et al.  
929 Recurrent jellyfish blooms are a consequence of global oscillations. *PNAS.*  
930 2013;110(3):1000–5.
- 931 54. Purcell JE, Uye S, Lo W. Anthropogenic causes of jellyfish blooms and their direct  
932 consequences for humans: a review. *Mar Ecol Prog Ser.* 2007;350:153–74.
- 933 55. Graham WM, Gelcich S, Robinson KL, Duarte CM, Brotz L, Purcell JE, et al. Linking  
934 human well-being and jellyfish: Ecosystem services, impacts, and societal responses.  
935 *Front Ecol Environ.* 2014;12(9):515–23.
- 936 56. Richardson AJ, Bakun A, Hays GC, Gibbons MJ. The jellyfish joyride: causes,  
937 consequences and management responses to a more gelatinous future. *Trends Ecol*  
938 *Evol.* 2009;24(6):312–22. Available from:  
939 <http://linkinghub.elsevier.com/retrieve/pii/S0169534709000883>
- 940 57. Purcell JE. Jellyfish and ctenophore blooms coincide with human proliferations and  
941 environmental perturbations. *Ann Rev Mar Sci.* 2012;4(1):209–35. Available from:  
942 <http://www.annualreviews.org/doi/abs/10.1146/annurev-marine-120709-142751>
- 943 58. Vodopivec M, Peliz AJ, Malej A. Offshore marine constructions as propagators of  
944 moon jellyfish dispersal. *Environ Res Lett.* 2017;12(8).
- 945 59. Kogovšek T, Vodopivec M, Raicich F, Uye S, Malej A. Comparative analysis of the  
946 ecosystems in the northern Adriatic Sea and the Inland Sea of Japan: Can  
947 anthropogenic pressures disclose jellyfish outbreaks? *Sci Total Environ* [Internet].  
948 2018;626:982–94. Available from:  
949 <http://www.sciencedirect.com/science/article/pii/S0048969718300111>
- 950 60. Malačič V, Petelin B. Gulf of Trieste. In: Cushman-Roisin B, Gacic M, Poulain P-M,  
951 Artegiani A, editors. *Physical oceanography of the Adriatic Sea: past, present and*  
952 *future.* Dordrecht: Kluwer Academic Press; 2001. p. 167–77.
- 953 61. Zobell CE. Marine microbiology. *Marine microbiology. A monograph on*  
954 *hydrobacteriology.* *Chronica Botanica.*; 1946. 240 p.
- 955 62. Giraffa G, Rossetti L, Neviani E. An evaluation of chelex-based DNA purification  
956 protocols for the typing of lactic acid bacteria. *J Microbiol Methods.* 2000;42(2):175–  
957 84.
- 958 63. Boström KH, Simu K, Hagström Å, Riemann L. Optimization of DNA extraction for



- 959 quantitative marine bacterioplankton community analysis. *Limnol Oceanogr Methods*.  
960 2004;2(1988):365–73.
- 961 64. Muyzer G, De Waal EC, Uitterlinden AG. Profiling of complex microbial populations  
962 by denaturing gradient gel electrophoresis analysis of polymerase chain reaction-  
963 amplified genes coding for 16S rRNA. *Appl Environ Microbiol*. 1993;59(3):695–700.
- 964 65. Muyzer G, Smalla K. Application of denaturing gradient gel electrophoresis (DGGE)  
965 and temperature gradient gel electrophoresis (TGGE) in microbial ecology. *Antonie*  
966 *Van Leeuwenhoek*. 1998;73:127–41.
- 967 66. Don RH, Cox PT, Wainwright BJ, Baker K, Mattick JS. “Touchdown” PCR to  
968 circumvent spurious priming during gene amplification. *Nucleic Acids Res*.  
969 1991;19(14):4008.
- 970 67. Dar SA, Kuenen JG, Muyzer G. Nested PCR-Denaturing Gradient Gel Electrophoresis  
971 approach to determine the diversity of sulfate-reducing bacteria in complex microbial  
972 communities. *Appl Environ Microbiol*. 2005;71(5):2325–30.
- 973 68. Giloteaux L, Goñi-Urriza M, Duran R. Nested PCR and new primers for analysis of  
974 sulfate-reducing bacteria in low-cell-biomass environments. *Appl Environ Microbiol*.  
975 2010;76(9):2856–65.
- 976 69. Schloss PD, Westcott SL, Ryabin T, Hall JR, Hartmann M, Hollister EB, et al.  
977 Introducing mothur: Open-source, platform-independent, community-supported  
978 software for describing and comparing microbial communities. *Appl Environ*  
979 *Microbiol*. 2009;75(23):7537–41.
- 980 70. Good IJ. No Title. *Biometrika*. 1953;40(3/4):237–64.
- 981 71. Clarke KR, Gorley RN. *PRIMER v6: Manual/Tutorial*. Prim Plymouth. 2006;
- 982 72. Hammer Ø, Harper DAT, Ryan PD. *PAST-PALaeontological STatistics*, ver. 1.89.  
983 *Palaeontol Electron*. 2001;4(1):1–9.
- 984 73. Taylor MW, Schupp PJ, Dahllöf I, Kjelleberg S, Steinberg PD. Host specificity in marine  
985 sponge-associated bacteria. *Environ Microbiol*. 2004;6(2):121–30.
- 986 74. Cooney RP, Pantos O, Tissier MDA Le, Barer MR, Donnell AGO, Bythell JC.  
987 Characterization of the bacterial consortium associated with black band disease in coral  
988 using molecular microbiological techniques. *Environ Microbiol*. 2002;4(7):401–13.
- 989 75. Bythell JC, Barer MR, Cooney RP, Guest JR, O’Donnell AG, Pantos O, et al.  
990 Histopathological methods for the investigation of microbial communities associated  
991 with disease lesions in reef corals. *Lett Appl Microbiol*. 2002;34:359–64.
- 992 76. Johnston IS, Rohwer F. Microbial landscapes on the outer tissue surfaces of the reef-  
993 building coral *Porites compressa*. *Coral Reefs*. 2007;26(2):375–83.
- 994 77. Garren M, Azam F. Corals shed bacteria as a potential mechanism of resilience to  
995 organic matter enrichment. *ISME J [Internet]*. 2012;6:1159–65. Available from:  
996 <http://dx.doi.org/10.1038/ismej.2011.180>
- 997 78. Apprill A, Marlow HQ, Martindale MQ, Rappé MS. Specificity of associations  
998 between bacteria and the coral *Pocillopora meandrina* during early development. *Appl*  
999 *Environ Microbiol*. 2012;78(20):7467–75.
- 1000 79. Holmström C, Kjelleberg S. Marine *Pseudoalteromonas* species are associated with  
1001 higher organisms and produce biologically active extracellular agents. *FEMS*  
1002 *Microbiol Ecol*. 1999;30:285–93.
- 1003 80. Dang H, Li T, Chen M, Huang G. Cross-Ocean Distribution of *Rhodobacterales*  
1004 bacteria as primary surface colonizers in temperate coastal marine waters. *Appl*  
1005 *Environ Microbiol*. 2008;74(1):52–60.
- 1006 81. Dang H, Lovell CR. Microbial surface colonization and biofilm development in marine  
1007 environments. *Microbiol Mol Biol Rev*. 2016;80(1):91–138.
- 1008 82. Deng M-C, Li J, Liang F-R, Yi M, Xu X-M, Yuan J-P, et al. Isolation and  
1009 characterization of a novel hydrocarbon-degrading bacterium *Achromobacter* sp. HZ01  
1010 from the crude oil-contaminated seawater at the Daya Bay, southern China. *Mar Pollut*  
1011 *Bull*. 2014;83(1):79–86.  
1012 <http://www.sciencedirect.com/science/article/pii/S0025326X14002306>
- 1013 83. Hong YH, Ye CC, Zhou QZ, Wu XY, Yuan JP, Peng J, et al. Genome sequencing  
1014 reveals the potential of *Achromobacter* sp. HZ01 for bioremediation. *Front Microbiol*.  
1015 2017;8:1–14.
- 1016 84. Juhasz AL, Britz ML, Stanley GA. Degradation of fluoranthene, pyrene, benz [a]

- 1017 anthracene and dibenz [a,h] anthracene by *Burkholderia cepacia*. J Appl Microbiol.  
1018 1997;83(2):189–98.
- 1019 85. Ryan RP, Monchy S, Cardinale M, Taghavi S, Crossman L, Avison MB, et al. The  
1020 versatility and adaptation of bacteria from the genus *Stenotrophomonas*. Nat Rev  
1021 Microbiol. 2009;7:514–25. <http://dx.doi.org/10.1038/nrmicro2163>
- 1022 86. Harayama S, Kishira H, Kasai Y, Shutsubo K. Petroleum biodegradation in marine  
1023 environments. J Mol Microbiol Biotechnol. 1999;1(1):63–70.
- 1024 87. Maravić A, Skočibušić M, Šprung M, Šamanić I, Puizina J, Pavela-Vrančić M.  
1025 Occurrence and antibiotic susceptibility profiles of *Burkholderia cepacia* complex in  
1026 coastal marine environment. Int J Environ Health Res. 2012;22(6):531–42.  
1027 <http://www.tandfonline.com/doi/abs/10.1080/09603123.2012.667797>
- 1028 88. DeLong EF, Franks DG, Alldredge AL. Phylogenetic diversity of aggregate-attached  
1029 marine bacterial assemblages. Limnol Oceanogr. 1993;38(5):924–34.
- 1030 89. Simon M, Grossart H, Schweitzer B, Ploug H. Microbial ecology of organic aggregates  
1031 in aquatic ecosystems. Aquat Microb Ecol. 2002;28:175–211.
- 1032 90. Ritchie KB. Regulation of microbial populations by coral surface mucus and mucus-  
1033 associated bacteria. Mar Ecol Prog Ser. 2006;322:1–14.
- 1034 91. Daniels CA, Zeifman A, Heym K, Ritchie KB, Watson CA, Berzins I, et al. Spatial  
1035 heterogeneity of bacterial communities in the mucus of *Montastraea annularis*. Mar  
1036 Ecol Prog Ser. 2011;426:29–40.
- 1037 92. Lampert Y, Kelman D, Dubinsky Z, Nitzan Y, Hill RT. Diversity of culturable bacteria  
1038 in the mucus of the Red Sea coral *Fungia scutaria*. FEMS Microbiol Ecol.  
1039 2006;58(1):99–108.
- 1040 93. Shnit-Orland M, Kushmaro A. Coral mucus-associated bacteria: a possible first line of  
1041 defense. FEMS Microbiol Ecol. 2009;67:371–80.
- 1042 94. Hao W, Gerdt G, Peplies J, Wichels A. Bacterial communities associated with four  
1043 ctenophore genera from the German Bight (North Sea). FEMS Microbiol Ecol.  
1044 2015;(October 2014):1–11.  
1045 <http://femsec.oxfordjournals.org/cgi/doi/10.1093/femsec/fiu006>
- 1046 95. Kirchman DL, Dittel AI, Malmstrom RR, Cottrell MT. Biogeography of major  
1047 bacterial groups in the Delaware Estuary. Limnol Oceanogr. 2005;50(5):1697–706.
- 1048 96. Webster NS, Wilson KJ, Blackall LL, Hill RT. Phylogenetic diversity of bacteria  
1049 associated with the marine sponge *Rhopaloeides odorabile*. Appl Environ Microbiol.  
1050 2001;67(1):434–44.
- 1051 97. Franzenburg S, Walter J, Künzel S, Wang J, Baines JF, Bosch TCG. Distinct  
1052 antimicrobial peptide expression determines host species-specific bacterial  
1053 associations. Proc Natl Acad Sci U S A. 2013;110(39):E3730–8.
- 1054 98. Allers E, Niesner C, Wild C, Pernthaler J. Microbes enriched in seawater after addition  
1055 of coral mucus. Appl Environ Microbiol. 2008;74(10):3274–8.
- 1056 99. Ben-Haim Y, Thompson FL, Thompson CC, Cnockaert MC, Hoste B, Swings J, et al.  
1057 *Vibrio corallilyticus* sp. nov., a temperature-dependent pathogen of the coral  
1058 *Pocillopora damicornis*. Int J Syst Evol Microbiol. 2003;53:309–15.
- 1059 100. Santos OCS, Pontes PVML, Santos JFM, Muricy G, Giambiagi-deMarval M, Laport  
1060 MS. Isolation, characterization and phylogeny of sponge-associated bacteria with  
1061 antimicrobial activities from Brazil. Res Microbiol. 2010;161:604–12
- 1062 101. Bacosa HP, Suto K, Inoue C. Bacterial community dynamics during the preferential  
1063 degradation of aromatic hydrocarbons by a microbial consortium. Int Biodeterior  
1064 Biodegrad. 2012;74:109–15. Available from:  
1065 <http://dx.doi.org/10.1016/j.ibiod.2012.04.022>
- 1066 102. Prince RC. Petroleum spill bioremediation in marine environments. Crit Rev  
1067 Microbiol. 1993;19(4):217–40.
- 1068 103. Abdelmohsen UR, Bayer K, Hentschel U. Diversity, abundance and natural products of  
1069 marine sponge-associated actinomycetes. Nat Prod Rep. 2014;31(3):381–99. Available  
1070 from: <http://xlink.rsc.org/?DOI=C3NP70111E>
- 1071 104. Palomo S, González I, De La Cruz M, Martín J, Tormo JR, Anderson M, et al. Sponge-  
1072 derived *Kocuria* and *Micrococcus* spp. as sources of the new thiazolyl peptide  
1073 antibiotic kocurin. Mar Drugs. 2013;11(4):1071–86.
- 1074 105. Harshvardhan K, Jha B. Biodegradation of low-density polyethylene by marine

- 1075 bacteria from pelagic water, Arabian Sea, India. *Mar Pollut Bull.* 2013;77:100–6.  
1076 106. Turk V, Mozetič P, Malej A. Overview of eutrophication-related events and other  
1077 irregular episodes in Slovenian Sea (Gulf of Trieste, Adriatic Sea). *Annales Ser hist nat*  
1078 2007;17:197-216.  
1079 107. Hočevar S, Malej A, Boldin B, Purcell JE. Seasonal fluctuations in population dynamics  
1080 of *aurelia aurita* polyp in situ with a modelling perspective. *Mar Ecol Prog Ser.* 2018;  
1081 591:155-166.  
1082 108. Dobretsov S, Qian P-Y. The role of epibiotic bacteria from the surface of the soft coral  
1083 *Dendronephthya* sp. in the inhibition of larval settlement. *J Expr Mar Biol Ecol.*  
1084 2004;299:35–50.  
1085 109. Holmström C, Egan S, Franks A, McCloy S, Kjelleberg S. Antifouling activities  
1086 expressed by marine surface associated *Pseudoalteromonas* species. *FEMS Microbiol*  
1087 *Ecol.* 2002;41:47–58.  
1088 110. Bruhn JB, Nielsen KF, Hjelm M, Hansen M, Schulz S, Gram L, et al. Ecology,  
1089 inhibitory activity, and morphogenesis of a marine antagonistic bacterium belonging to  
1090 the *Roseobacter* clade. *Appl Environ Microbiol.* 2005;71(11):7263–70.  
1091 111. Gram L, Melchiorson J, Bruhn JB. Antibacterial activity of marine culturable bacteria  
1092 collected from a global sampling of Ocean surface waters and surface swabs of marine  
1093 organisms. *Mar Biotechnol.* 2010;12:439–51.  
1094 112. Porsby CH, Nielsen KF, Gram L. *Phaeobacter* and *Ruegeria* Species of the  
1095 *Roseobacter* clade colonize separate niches in a Danish Turbot (*Scophthalmus*  
1096 *maximus*)- rearing farm and antagonize *Vibrio anguillarum* under different growth  
1097 conditions. *Appl Environ Microbiol.* 2008;74(23):7356–64.  
1098 113. Selvin J, Joseph S, Asha KRT, Manjusha W a., Sangeetha VS, Jayaseema DM, et al.  
1099 Antibacterial potential of antagonistic *Streptomyces* sp. isolated from marine sponge  
1100 *Dendrilla nigra*. *FEMS Microbiol Ecol.* 2004;50(2):117–22.  
1101 114. Arai MN. *A Functional Biology of Scyphozoa*. First edit. London: Chapman & Hall;  
1102 1997. 316 p.  
1103 115. Gemmell BJ, Bacosa HP, Liu Z, Buskey EJ. Can gelatinous zooplankton influence the  
1104 fate of crude oil in marine environments? *Mar Pollut Bull* [Internet]. 2016;113(1–  
1105 2):483–7. Available from: <http://dx.doi.org/10.1016/j.marpolbul.2016.08.065>  
1106 116. Hall NM, Berry KLE, Rintoul L, Hoogenboom MO. Microplastic ingestion by  
1107 scleractinian corals. *Mar Biol.* 2015;162(3):725–32.  
1108 117. Almeda R, Wambaugh Z, Chai C, Wang Z, Liu Z, Buskey EJ. Effects of Crude Oil  
1109 Exposure on bioaccumulation of polycyclic aromatic hydrocarbons and survival of  
1110 adult and larval stages of gelatinous zooplankton. *PLoS One.* 2013;8(10):20–1.  
1111 118. Pitt KA, Chelsky Budarf A, Browne JG, Condon RH. Bloom and Bust: Why do blooms  
1112 of jellyfish collapse? In: Pitt KA, Lucas CH, editors. *Jellyfish Blooms*. Netherlands:  
1113 Springer; 2014. p. 79–103.  
1114 119. Graham WM, Chiaverano L, D’ambra I, Mianzan H, Colombo GA, Acha EM, et al.  
1115 Fish and jellyfish: using the isolated marine “lakes” of Mljet Island, Croatia, to explore  
1116 larger marine ecosystem complexities and ecosystem-based management approaches.  
1117 In: *Annales series historia naturalis*. 2009. p. 39–48.  
1118 120. Eilers H, Pernthaler J, Amann R. Succession of pelagic marine bacteria during  
1119 enrichment: A close look at cultivation-induced shifts. *Appl Environ Microbiol.*  
1120 2000;66(11):4634–40.  
1121 121. Thompson FL, Iida T, Swings J. Biodiversity of *Vibrios*. *Microbiol Mol Biol Rev.*  
1122 2004;68(3):403–31.  
1123 122. Reshef L, Koren O, Loya Y, Zilber-Rosenberg I, Rosenberg E. The coral probiotic  
1124 hypothesis. *Environ Microbiol.* 2006;8(12):2068–73.

1125

## Supporting Information

1126

1127

1128

1129

1130

**S1 Table. Composition of 16S rRNA gene clone libraries (% of clones) from samples of jellyfish exumbrella (AK), oral arms (AR) and mucus from gastral cavity (AG) and seawater samples (W) at 5m depth collected on May and June 2011 in the Gulf of Trieste.**



1131 Classification of bacterial clones was done down to the family level. The contribution of distinct  
1132 bacterial families is expressed as a percentage of the total number of sequences in each sample.  
1133 N is the total number of bacterial clones in the library; Sobs is the number of distinct bacterial  
1134 families. In brackets beside bacterial family are the only representatives detected within the  
1135 family. Numbers (N) in light grey and with asterisk (\*) are total number of sequences recovered  
1136 from clone library, including sequences affiliated with Chloroplast (%; presented at the bottom  
1137 of table) that were omitted from further analysis.

1138  
1139 **S2 Table. Bacterial isolates obtained from samples of jellyfish exumbrella (AK) and**  
1140 **mucus from gastral cavity (AG) and seawater samples (W) at 5 m depth collected on May**  
1141 **and June 2011 in the Gulf of Trieste.** Classification of bacterial isolates was done down to  
1142 the genus level. The contribution of distinct bacterial genus or families is expressed as a  
1143 percentage of the total number of sequences in each sample. N is the total number of isolated  
1144 bacteria; Sobs is the number of distinct bacterial genus.

1145  
1146 **S3 Table. Similarities percentage (SIMPER) analysis of 16S rRNA gene clone libraries**  
1147 **from samples of jellyfish exumbrella (AK), oral arms (AR) and mucus from gastral cavity**  
1148 **(AG) and seawater samples (W) collected on May and June 2011 in the Gulf of Trieste.**  
1149 Seawater group (W) includes water samples collected at 5m depth on May and June.

1150  
1151 **S4 Table. Similarities percentage (SIMPER) analysis of culturable fraction of bacterial**  
1152 **community associated with jellyfish exumbrella (AK), mucus from gastral cavity (AG)**  
1153 **and seawater (W) collected in May and June 2011 in the Gulf of Trieste.** Seawater group  
1154 (W) includes the results of the water samples collected at 5m depth on May and June.

1155  
1156 **S5 Table. The diversity indices S, H', d, J', Chao- 1 and library coverage's (C) describing**  
1157 **composition of total bacterial community associated with jellyfish exumbrella (AK), oral**  
1158 **arms (AR) and mucus from gastral cavity (AG) and seawater (W) collected in May and**  
1159 **June 2011 in the Gulf of Trieste.** S represents the number of distinct bacterial families detected  
1160 in each bacterial 16S rRNA gene clone library. C is a coverage value ( $C = (1 - n1/N)$ , where n1  
1161 is number of phylotypes appearing only once in the library and N is the library size.

1162  
1163 **S6 Table. The diversity indices S, H', d, J', Chao- 1 describing composition of culturable**  
1164 **fraction of bacterial community associated with jellyfish exumbrella (AK) and mucus**  
1165 **from gastral cavity (AG) and seawater (W) collected in May and June 2011 in the Gulf of**  
1166 **Trieste.** S represents the number of distinct bacterial genus detected in each sample.

1167  
1168 **S7 Table. Bacterial 16S rRNA sequences obtained from DGGE bands from jellyfish**  
1169 **samples with their accession numbers.** In the table is the name and an accession number of  
1170 their closest relative in GeneBank (NCBI) with % of similarity, family, taxon and isolation  
1171 source.

1172  
1173 **S8 Table. Similarities percentage (SIMPER) analysis of 16S rRNA gene clone libraries**  
1174 **from jellyfish samples collected at the time of population peak and at the end of the bloom**  
1175 **in the Gulf of Trieste.** Group May includes samples of jellyfish exumbrella surface (AK1,  
1176 AK2) and oral arms (AR1) sampled in May. Group June includes samples of jellyfish  
1177 exumbrella surface (AK6, AK7) and oral arms (AR6) collected in June.

1178  
1179 **S9 Table. Similarities percentage (SIMPER) analysis of culturable fraction of bacterial**  
1180 **community associated with jellyfish at the time of population peak and at the end of the**

1181 **bloom in the Gulf of Trieste.** Group May includes samples of jellyfish exumbrella surface  
1182 (AK1, AK3, AK6) and gastral cavity (AG1, AG6) collected in May. Group June includes  
1183 samples of jellyfish exumbrella surface (AK8, AK10, AK11) and gastral cavity (AG8, AG11)  
1184 collected in June.

1185  
1186 **S1 Fig. DGGE profile of bacterial 16S rRNA gene fragments of samples from *Aurelia***  
1187 **jellyfish exumbrella surface, oral arms and mucus from gastral cavity.** AK1, AK2:  
1188 exumbrella surface of jellyfish collected in May; AK6, AK7: exumbrella surface of jellyfish  
1189 collected in June; AR1: sample of oral arms of jellyfish collected in May; AR6: oral arms of  
1190 jellyfish collected in June; AG1: gastral cavity mucus sample; S: standard. Numbers on the  
1191 figure represent bands that were cut from the gel and successfully sequenced; color dots place  
1192 sequence in one of bacterial groups.

1193

A

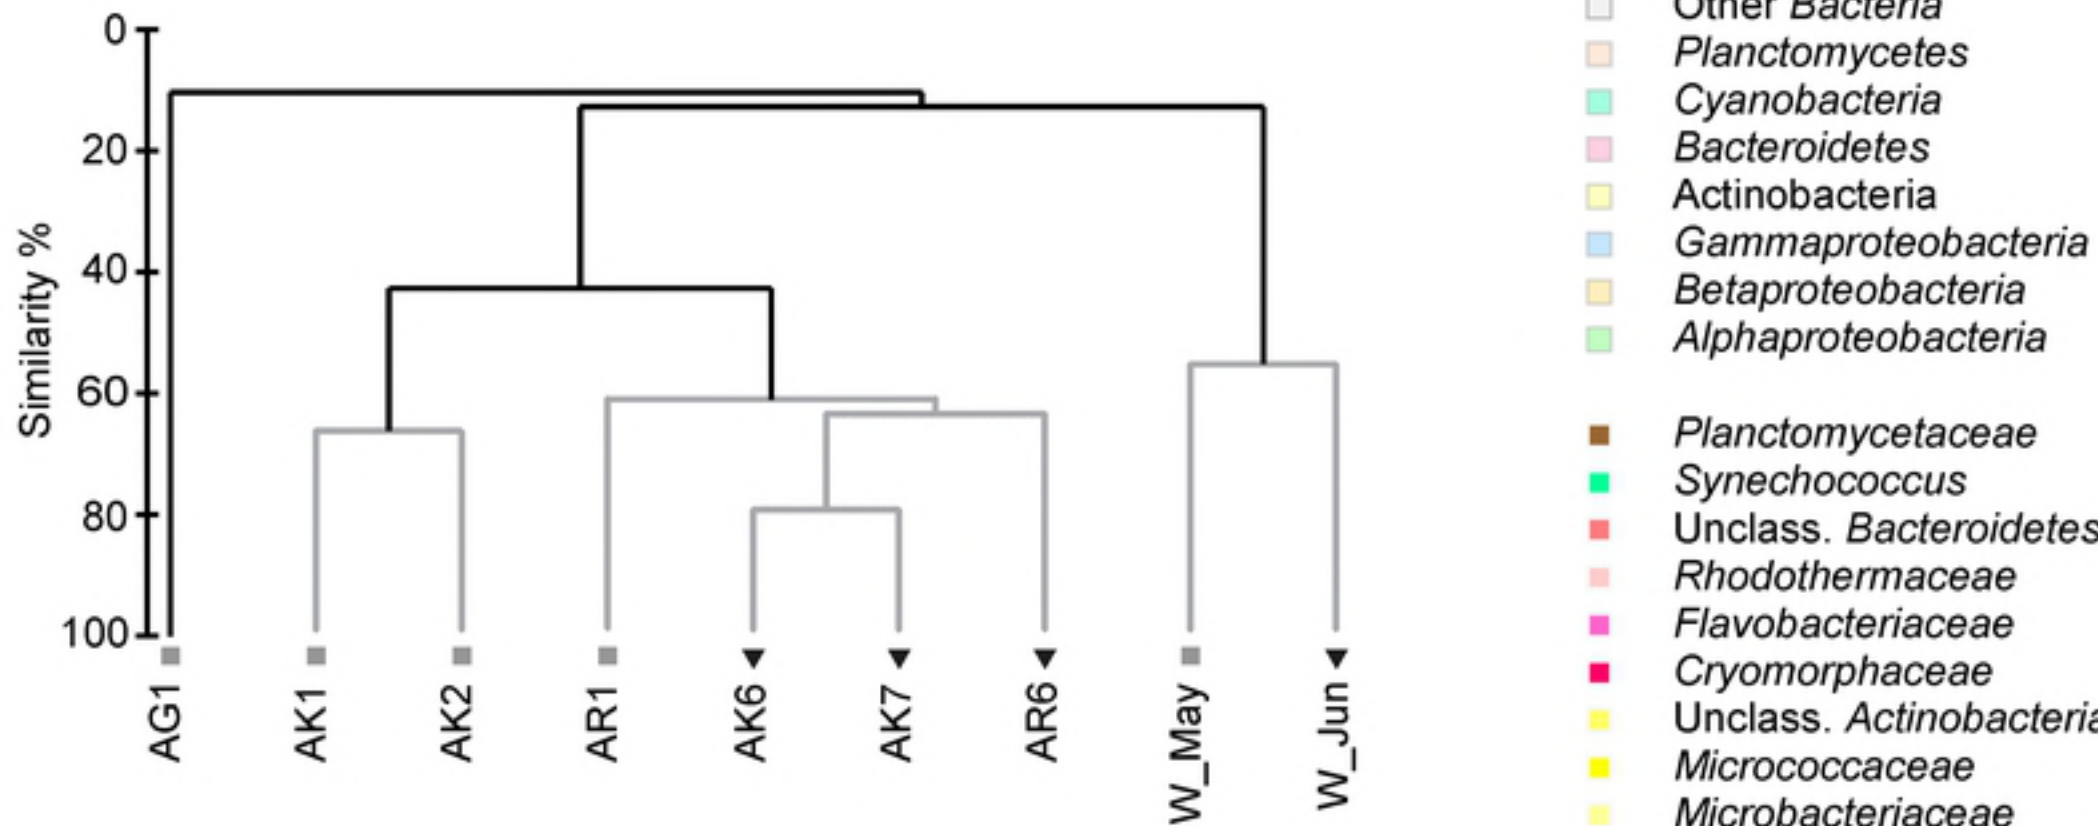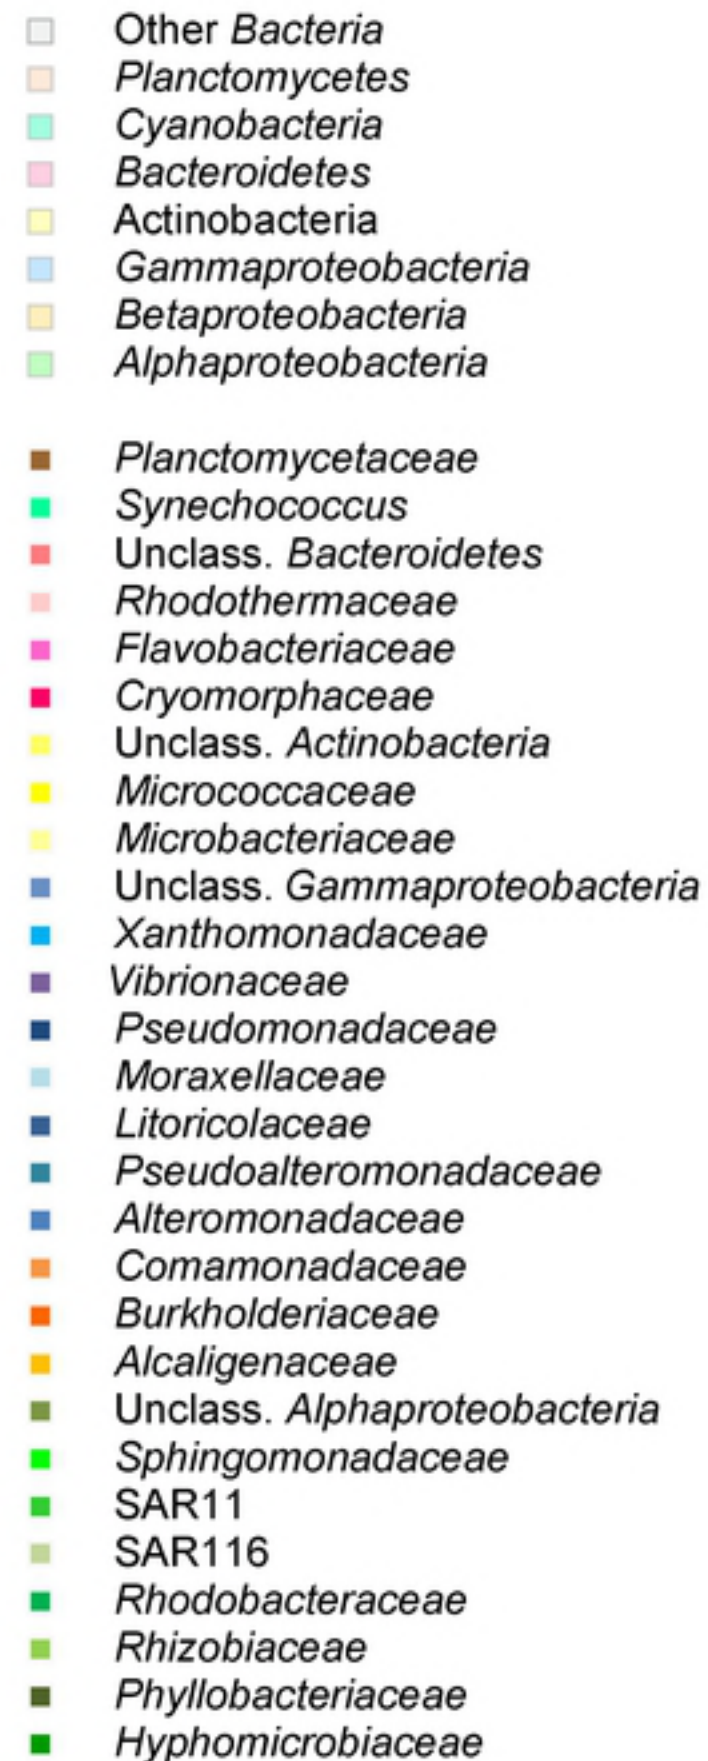

B

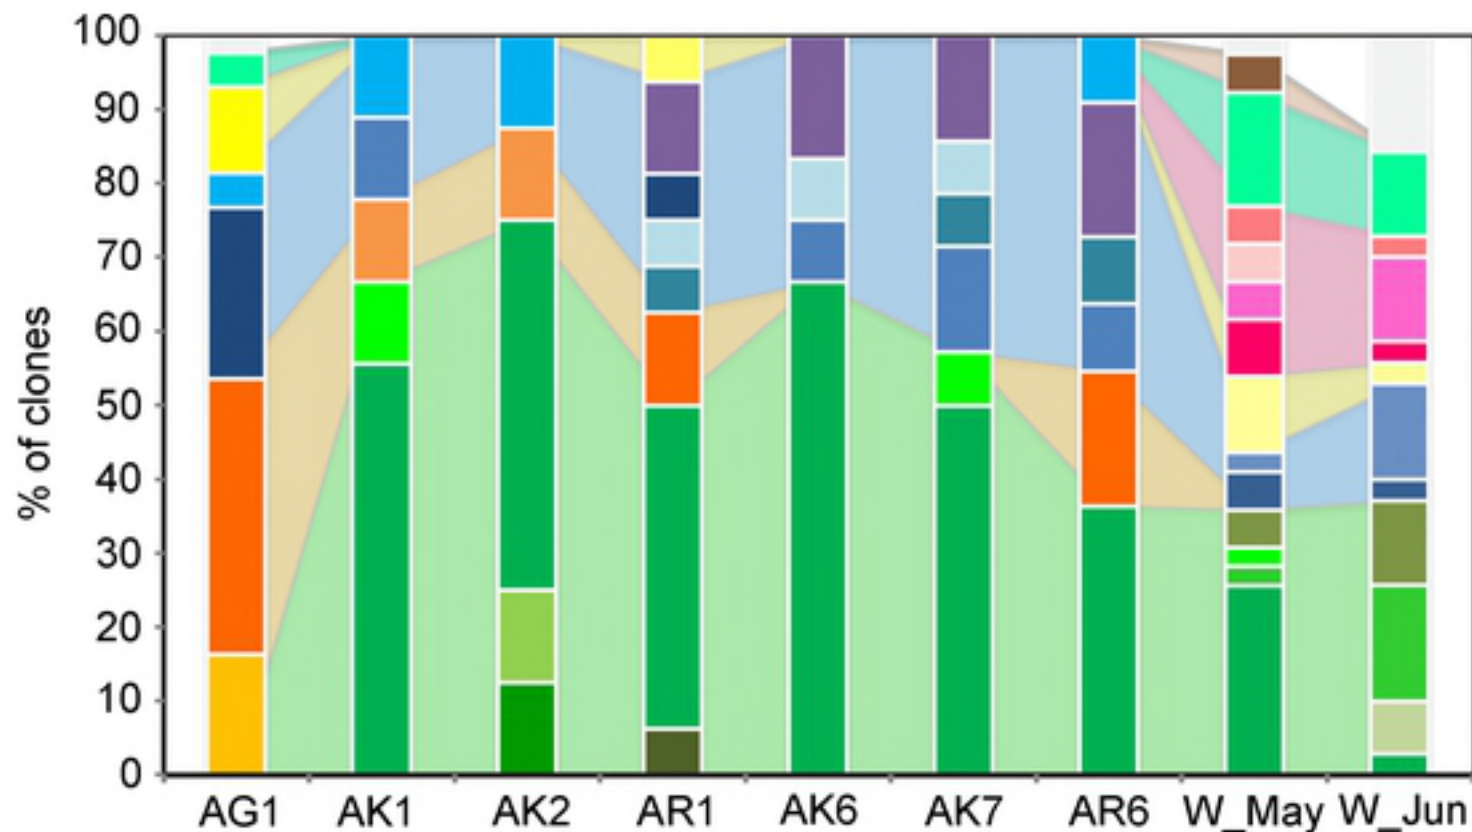

Resemblance: S7 Jaccard

2D Stress: 0

AG1  
■

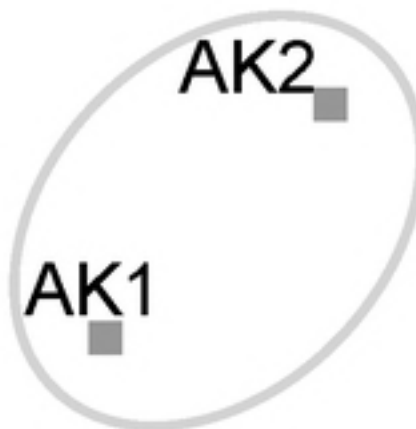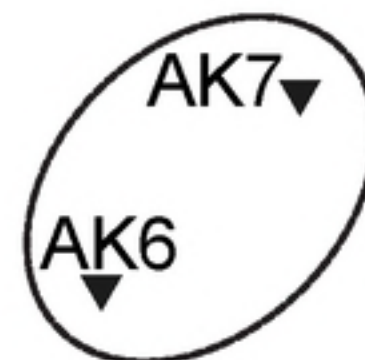

AR1  
■

AR6  
▼

Similarity %

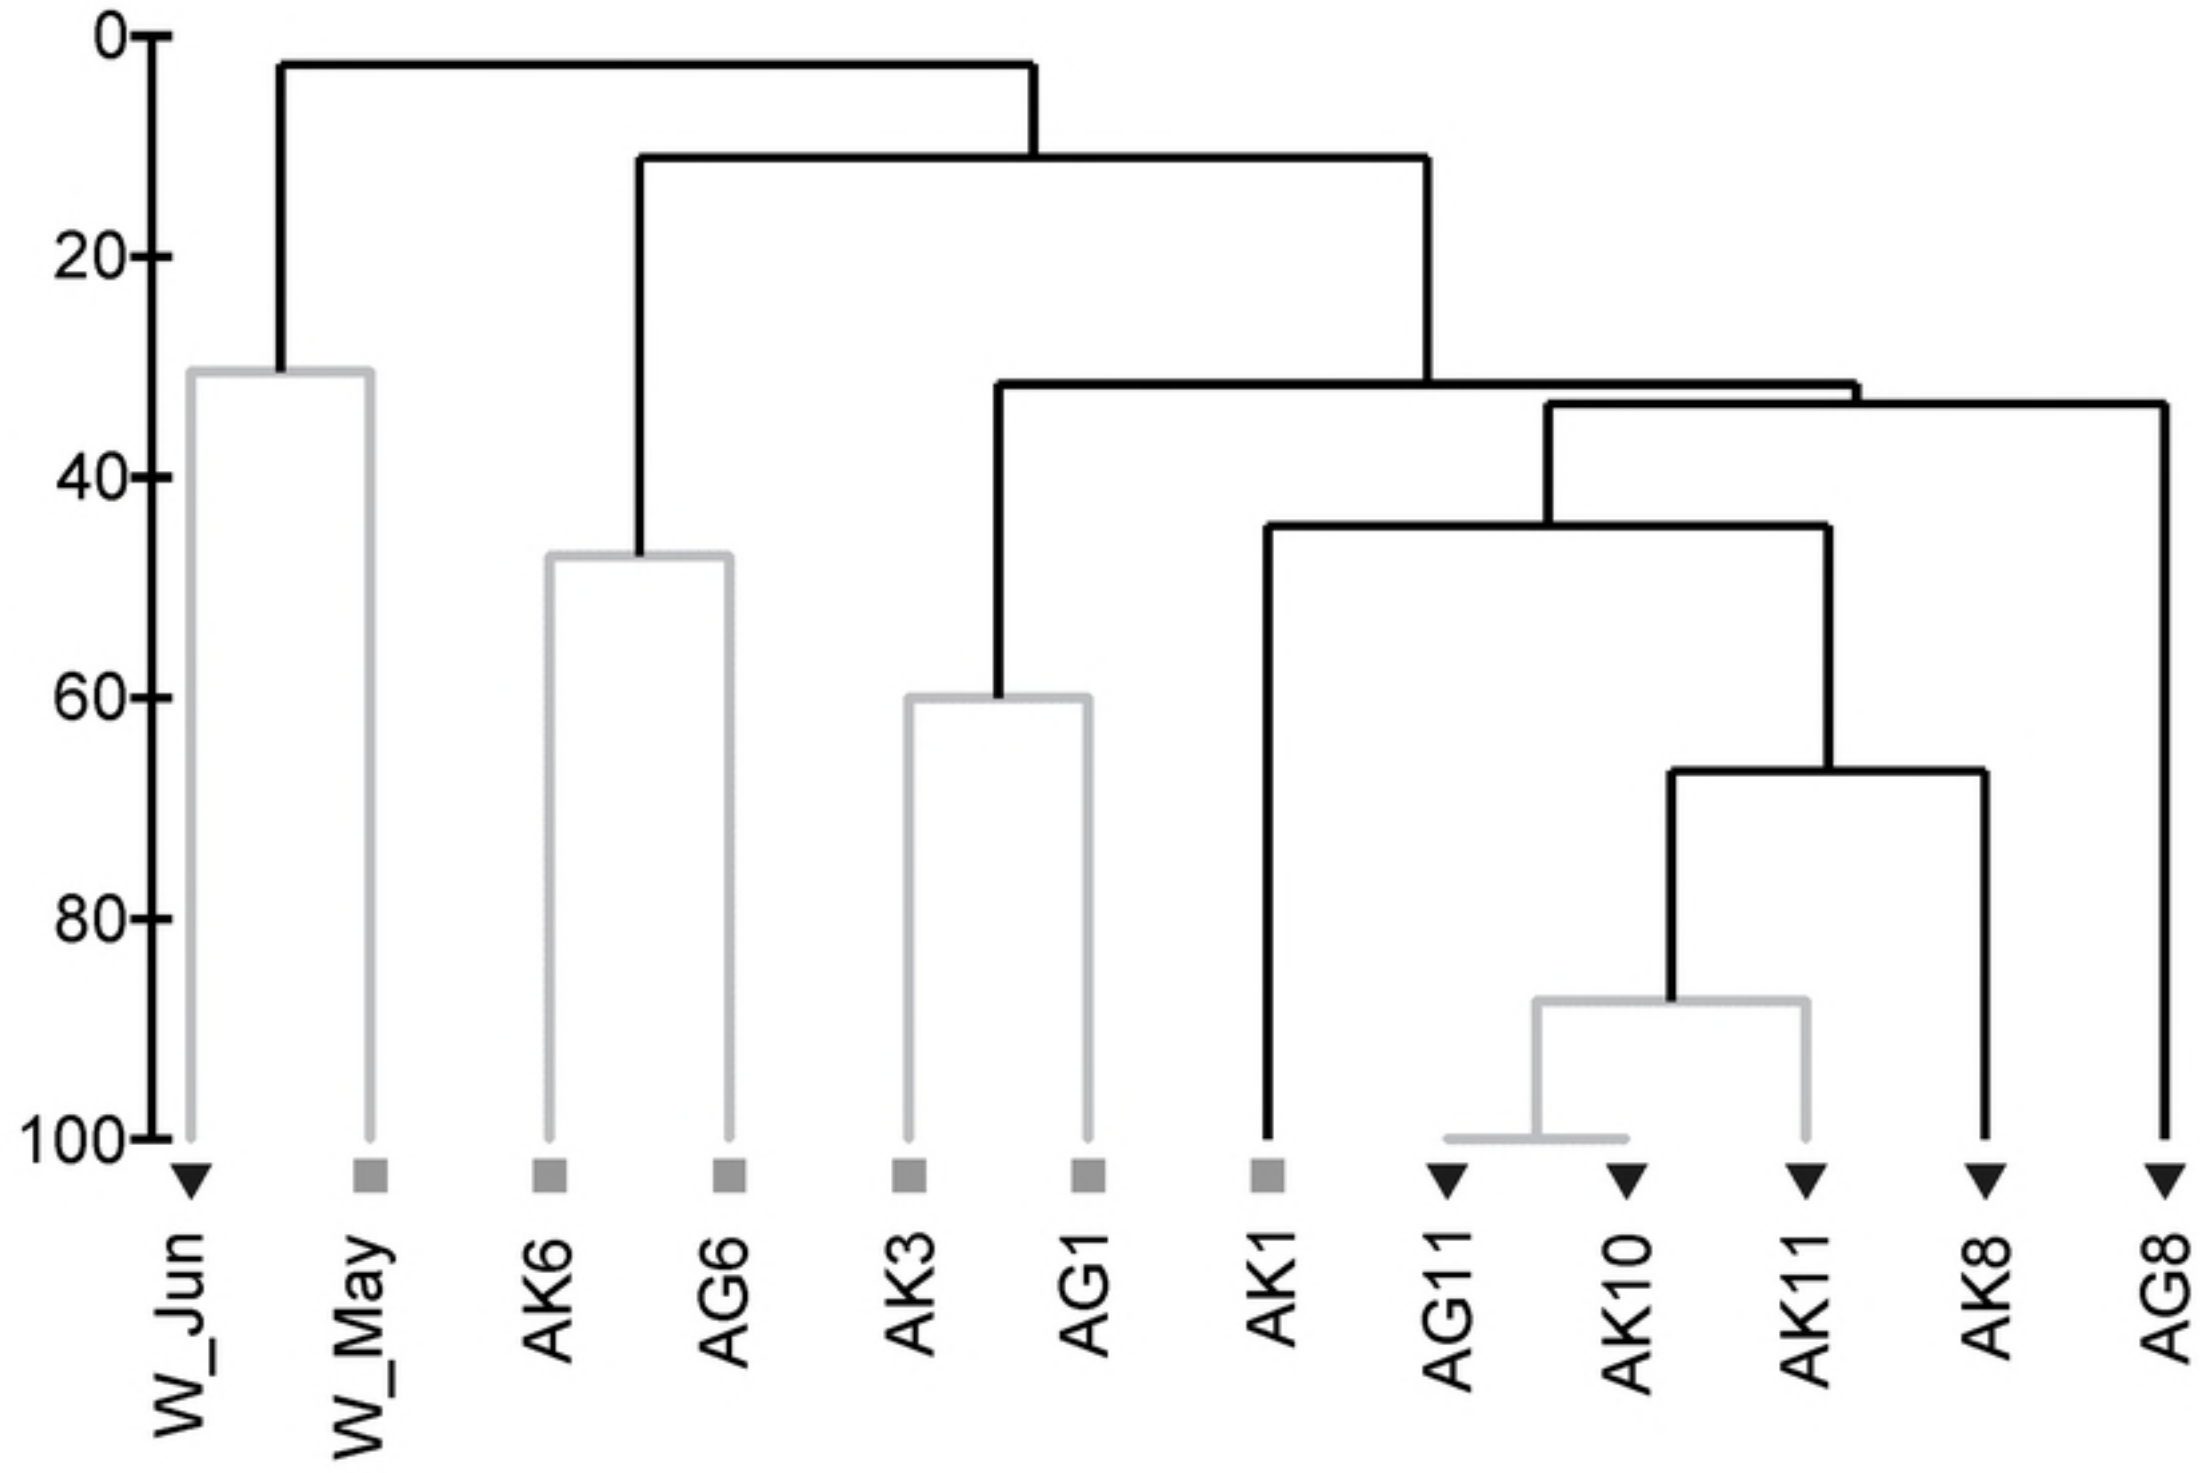



A

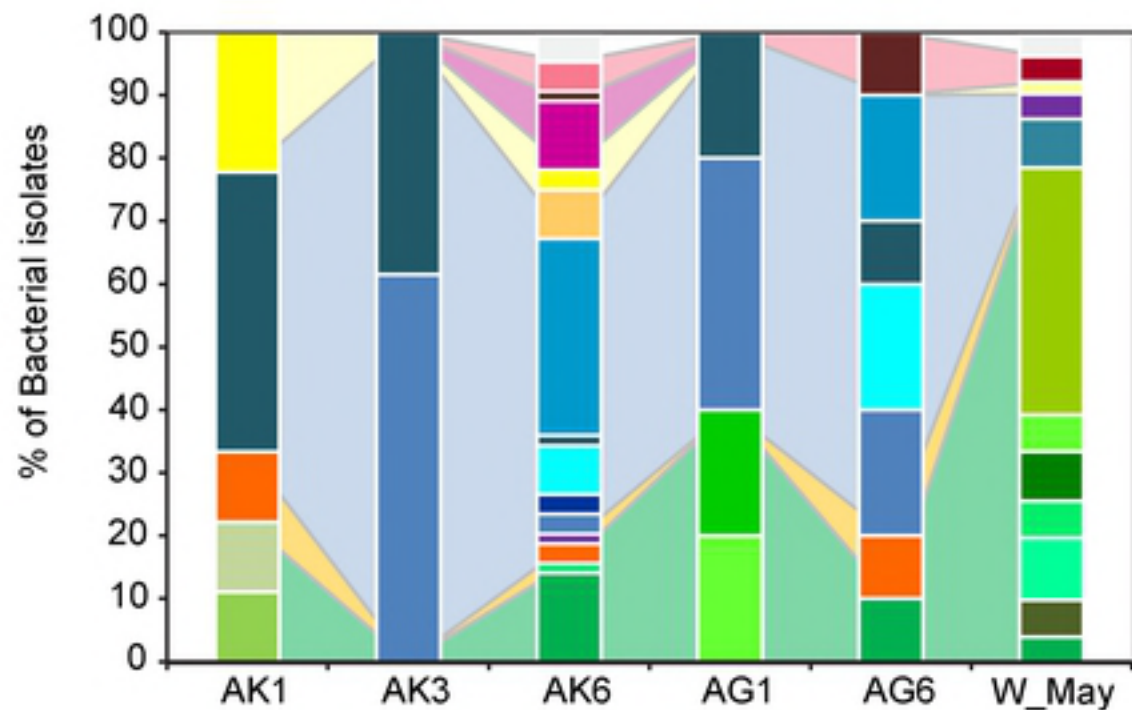

B

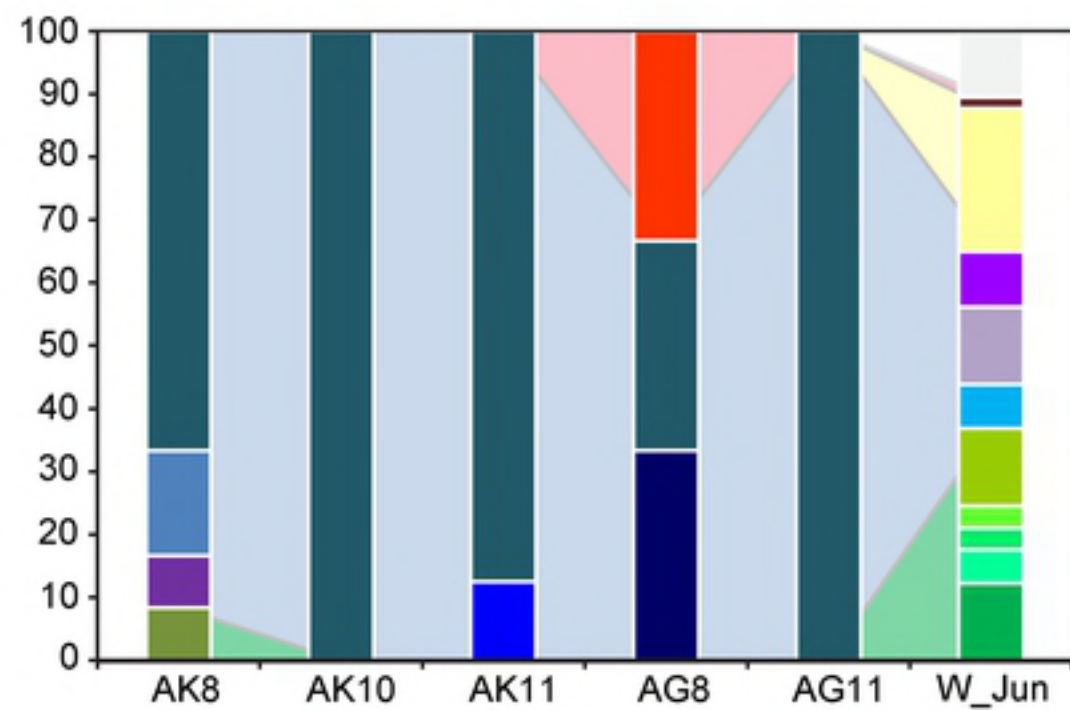

Alphaproteobacteria

Betaproteobacteria

Gammaproteobacteria

Actinobacteria

Spingobacteria

Bacilli

Other Bacteria

Aurantimonas

Unclass. Phyllobacteriaceae

Brevundimonas

Donghicola

Labrenzia

Paracoccus

Marivita

Phaeobacter

Unclass. Rhodobacteraceae

Erythrobacter

Unclass. Erythrobacteraceae

Unclass. Sphingomonadaceae

Delftia

Alteromonas

Marinobacter

Halomonas

Unclass. Oceanospirillales

Idiomarina

Pseudoalteromonas

Acinetobacter

Psychrobacter

Pseudomonas

Vibrio

Stenotrophomonas

Microbacterium

Kocuria

Sphingobacterium

Bacillus

Terribacillus

Exiguobacterium

Staphylococcus
